1 **Title: mitoNEET Regulates Mitochondrial Iron Homeostasis Interacting with**  
2 **Transferrin Receptor**

3

4 **Running Title: mitoNEET Regulates Mitochondrial Iron Homeostasis**

5

6 **Key words:** mitochondrial iron; protein-protein interaction; reactive oxygen species;  
7 mitochondrial respiration; cardiac dysfunction

8

9 Takaaki Furihata<sup>1</sup>, Shingo Takada<sup>1</sup>, Satoshi Maekawa<sup>1</sup>, Wataru Mizushima<sup>1</sup>, Masashi  
10 Watanabe<sup>2</sup>, Hidehisa Takahashi<sup>2</sup>, Arata Fukushima<sup>1</sup>, Masaya Tsuda<sup>1</sup>, Junichi  
11 Matsumoto<sup>1</sup>, Naoya Kakutani<sup>1</sup>, Takashi Yokota<sup>1</sup>, Shouji Matsushima<sup>1,3</sup>, Yutaro Otsuka<sup>4</sup>,  
12 Masaki Matsumoto<sup>5</sup>, Keiichi I. Nakayama<sup>5</sup>, Junko Nio-Kobayashi<sup>6</sup>, Toshihiko Iwanaga<sup>6</sup>,  
13 Hisataka Sabe<sup>4</sup>, Shigetsugu Hatakeyama<sup>2</sup>, Hiroyuki Tsutsui<sup>1,3</sup>, and Shintaro Kinugawa<sup>1,a</sup>

14

15 <sup>1</sup>Department of Cardiovascular Medicine, Faculty of Medicine and Graduate School of  
16 Medicine, Hokkaido University, Kita-15, Nishi-7, Kita-ku, Sapporo, 060-8638, Japan

17 <sup>2</sup>Department of Biochemistry, Faculty of Medicine and Graduate School of Medicine,  
18 Hokkaido University, Kita-15, Nishi-7, Kita-ku, Sapporo, 060-8638, Japan

19 <sup>3</sup>Department of Cardiovascular Medicine, Kyushu University Graduate School of  
20 Medical Sciences, 3-1-1 Maidashi, Higashi-ku, Fukuoka, 812-8582, Japan

21 <sup>4</sup>Department of Molecular Biology, Faculty of Medicine and Graduate School of  
22 Medicine, Hokkaido University, Kita-15, Nishi-7, Kita-ku, Sapporo, 060-8638, Japan

23 <sup>5</sup>Department of Molecular and Cellular Biology, Medical Institute of Bioregulation,  
24 Kyushu University, 3-1-1 Maidashi, Higashi-ku, Fukuoka, 812-8582, Japan

25 <sup>6</sup>Laboratory of Histology and Cytology, Department of Anatomy, Faculty of Medicine  
26 and Graduate School of Medicine, Hokkaido University, Kita-15, Nishi-7, Kita-ku,  
27 Sapporo, 060-8638, Japan

28

29 <sup>a</sup>Correspondence: Shintaro Kinugawa, M.D., Ph.D.

30 Phone: +81-011-706-6973

31 E-mail:[tuckahoe@med.hokudai.ac.jp](mailto:tuckahoe@med.hokudai.ac.jp)

32

33 **Abstract**

34 Iron is an essential trace element for regulation of redox and mitochondrial function,  
35 and then mitochondrial iron content is tightly regulated in mammals. We focused on a  
36 novel protein localized at the outer mitochondrial membrane. Immunoelectron  
37 microscopy revealed transferrin receptor (TfR) displayed an intimate relationship with  
38 the mitochondria, and mass spectrometry analysis also revealed mitoNEET interacted  
39 with TfR *in vitro*. Moreover, mitoNEET was endogenously coprecipitated with TfR in  
40 the heart, which indicates that mitoNEET also interacts with TfR *in vivo*. We generated  
41 mice with cardiac-specific deletion of mitoNEET (mitoNEET-knockout). Iron contents  
42 in isolated mitochondria were significantly increased in mitoNEET-knockout mice  
43 compared to control mice. Mitochondrial reactive oxygen species (ROS) were higher,  
44 and mitochondrial maximal capacity and reserve capacity were significantly decreased  
45 in mitoNEET-knockout mice, which was consistent with cardiac dysfunction evaluated  
46 by echocardiography. The complex formation of mitoNEET with TfR may regulate  
47 mitochondrial iron contents via an influx of iron. A disruption of mitoNEET could thus  
48 be involved in mitochondrial ROS production by iron overload in the heart.

49

## 50 **Introduction**

51 Mitochondrial function is impaired with aging in various organs, including the  
52 heart, brain, and skeletal muscle (Bagh, Thakurta et al., 2011, Kwong & Sohal, 2000, Li,  
53 Kumar Sharma et al., 2013, Sugiyama, Takasawa et al., 1993). Age-dependent  
54 mitochondrial dysfunction is one of the main causes of organ failure and cellular  
55 dysfunction (Dai & Rabinovitch, 2009). Mitochondria are one of the main sources of  
56 reactive oxygen species (ROS) generation, which is associated with mitochondrial  
57 dysfunction. Conversely, mitochondria are highly susceptible to attack by ROS, because  
58 they contain iron/sulfur clusters (ISCs). Thus, once the mitochondria are impaired for  
59 any reason, an increase in ROS generation can, in itself, induce a vicious cycle of  
60 further impairment in mitochondria function, further ROS generation, and cellular  
61 injury (Ikeuchi, Matsusaka et al., 2005, Suematsu, Tsutsui et al., 2003).

62 Iron is one of the most abundant metals on earth and an essential trace element  
63 for both cellular energy and metabolism and the maintenance of body homeostasis.  
64 Excessive iron damages cells via iron toxicity and ROS production, while iron  
65 deficiency impairs cellular proliferation (Oliveira, Rocha et al., 2014). Thus iron  
66 concentrations in mammals need to be tightly and constantly regulated at the dietary,  
67 plasma, extracellular, cellular and mitochondrial levels (Ganz, 2013). Despite the  
68 numerous studies on iron homeostasis in the last few decade (Anderson, Shen et al.,  
69 2012, Anderson & Vulpe, 2009), mitochondrial iron homeostasis remains largely  
70 unexplored. ISCs and heme are produced only within mitochondria (Richardson, Lane  
71 et al., 2010), and are used as components of many enzymes in the cytosol and  
72 mitochondria. Therefore, iron-homeostasis regulation is closely associated with  
73 mitochondrial function and cellular function. Some proteins involved in influx of iron to

74 mitochondria, transfer of iron within mitochondria, and efflux of iron from  
75 mitochondria have been identified, and all these proteins exist in the mitochondrial  
76 inner membrane or within mitochondria (Branda, Cavadini et al., 1999, Ichikawa,  
77 Bayeva et al., 2012, Paradkar, Zumbrennen et al., 2009, Srinivasan, Pierik et al., 2014,  
78 Vigani, Tarantino et al., 2013). Iron bound on transferrin (Tf) and transferrin receptor  
79 (TfR), namely Tf-TfR complex, is carried to the cytosol as endosomes, and then iron  
80 dissociated from the complex transports across the endosomal membrane to the labile  
81 iron pool in the cytosol. Iron from the labile iron pool is carried into the mitochondria to  
82 utilize this iron for mitochondrial iron homeostasis (Gkouvatsos, Papanikolaou et al.,  
83 2012). Whereas some proteins involved in iron inflow into the mitochondria are known  
84 to be in the inner mitochondrial membrane (Richardson et al., 2010), novel proteins  
85 involved in mitochondrial iron homeostasis may also exist in the outer mitochondrial  
86 membrane (OMM).

87       It has recently been reported that mitoNEET is a novel protein localized at the  
88 OMM and a target protein of the insulin-sensitizing drug pioglitazone (Wiley, Murphy  
89 et al., 2007a). Analysis of the expression of mRNAs from murine tissues revealed that  
90 mitoNEET was widely expressed in mice, with especially high levels in the heart.  
91 Experiments using optical and electron paramagnetic resonance spectroscopy clarified  
92 that mitoNEET contained iron/sulfur clusters that were redox-active and functioned as  
93 electron-transfer proteins (Wiley, Paddock et al., 2007b). Moreover, complex I-linked  
94 state 3 respiration was significantly decreased in isolated mitochondria from the hearts  
95 of mitoNEET-null mice. These results allowed us to hypothesize that mitoNEET was a  
96 candidate for the regulatory protein of iron homeostasis.

97           The regulation of mitochondrial function is especially important for the  
98 maintenance of cardiac function, because the heart is a mitochondria-rich organ (Rosca  
99 & Hoppel, 2010). In the present study, we focused on the mechanisms underlying the  
100 regulation of mitochondrial iron homeostasis in the heart, and verified our hypothesis  
101 that mitoNEET is the regulator of iron homeostasis. To accomplish this, we used lox-P  
102 and homologous recombination to establish mice with cardiac-specific deletion of  
103 mitoNEET.  
104

105 **Results**

106 **mitoNEET combines with TfR and is regulated by iron**

107 TfR have been known to be located in plasma membrane or endosome (Das,  
108 Nag et al., 2016). Surprisingly, in mitochondrial fraction, TfR were detected evaluated  
109 by immunoblot, though there existed no other proteins localized in cellular matrix  
110 (glyceraldehyde phosphate dehydrogenase; GAPDH), endosome (Ras-related protein  
111 Rab-5; Rab5) or plasma membrane (Cadherin) (**Fig 1A**). The silver-intensified  
112 immunogold method for electron microscopy revealed the subcellular localization of  
113 TfR in the C2C12 cells incubated with iron. Immunogold particles showing the  
114 localization of TfR were frequently associated with (cytoplasmic) vesicles and vacuoles  
115 of various sizes and shapes, which might correspond to endosomes. In addition, gold  
116 particles displayed an intimate relationship with mitochondria, where they attached the  
117 outer membrane of mitochondria. (**Fig 1B**). Protein-protein interactions are often  
118 important to realize biological functions *in vivo*. To elucidate what kind of  
119 mitochondrial protein is involved in mitochondrial iron homeostasis, we focused on TfR.  
120 That is because TfR is thought to have a critical role in iron uptake into the cell. So  
121 silver-stained gels with the immunoprecipitated protein by TfR antibody in the  
122 mitochondria from the mouse heart acquired some bands (**Fig 1C**), suggesting that  
123 endogenous TfR coprecipitated with some endogenous mitochondrial proteins. We  
124 think that mitoNEET could play a critical role in mitochondrial iron homeostasis, for  
125 mitoNEET simultaneously fulfill below conditions; localized at the OMM (Das et al.,  
126 2016, Wiley et al., 2007a), containing ISCs (Paddock, Wiley et al., 2007), and involved  
127 in iron metabolism (Kusminski, Holland et al., 2012) (**Fig 1D**). Actually, candidate  
128 proteins were picked up by using mass spectrometry, and what we focused on as the

129 strongest candidate was just TfR (**Fig 1E, Appendix Table S1, S2**). Moreover,  
130 mitoNEET was endogenously coprecipitated with TfR in the heart, which indicates that  
131 mitoNEET also interacts with TfR *in vivo* (**Fig 1F, 1G**). The levels of mitoNEET  
132 protein expression were higher in the addition of ferric ammonium citrate, and lower in  
133 the addition of desferioxamine compared to control (**Fig 1H**), and the changes in iron  
134 content were consistent with the changes in mitoNEET protein expression (**Appendix**  
135 **Fig S1**), suggesting that there may be some connections between mitoNEET and iron  
136 homeostasis. There was a significant positive correlation between mitoNEET expression  
137 levels and mitochondrial respiration (**Fig 1I**), suggesting that mitoNEET may have an  
138 important role in regulating cellular function via iron homeostasis.

139

#### 140 **mitoNEET and Transferrin Receptor Colocalizes on the Mitochondria**

141 If mitoNEET interact with transferrin receptor, these proteins should colocalize  
142 in the mitochondria. We subsequently performed immunoprecipitation by using  
143 mitochondrial fraction. As we expected, mitoNEET coprecipitated with TfR in  
144 mitochondria from the heart in mice, suggesting that TfR, which has been thought to be  
145 only plasma membrane or endosomes, did exist with mitochondria (**Fig 2A**). Moreover,  
146 to determine whether TfR localizes to the OMM, we used digitonin, which is efficiently  
147 able to extract cholesterol in the OMM protein (Arasaki, Shimizu et al., 2015). To  
148 confirm the purity of isolated mitochondria, Cadherin and GAPDH were analyzed by  
149 immunoblot. These were not detected in supernatant and pellet. Heat-shock protein 60  
150 was not detected in supernatant even with the treatment of digitonin, suggesting that  
151 digitonin used in the present study did not affect the inner mitochondrial membrane.  
152 Voltage-dependent anion channel (VDAC), a known OMM protein, was dose-



153 dependently increased in supernatant and decreased in pellet by digitonin treatment. The  
154 changes in mitoNEET and TfR protein levels by the treatment with digitonin were  
155 similar to VDAC (**Fig 2B**). These data strongly suggest that TfR localizes to the OMM  
156 interacting with mitoNEET, besides plasma membrane or endosome. Immunostaining  
157 for mitoNEET (green) merged with TfR (red) in mouse C2C12 cells. In control,  
158 mitoNEET was localized at the OMM along surface of the mitochondria, and TfR  
159 mainly existed on the inside of cytosolic membrane. In iron overload circumstances,  
160 TfR partially transferred from membrane to cytosol, some of which colocalized with  
161 mitoNEET, suggesting that this increase of colocalization helps TfR to stay on the  
162 mitochondria in order to cope with iron overload (**Fig 2C**).

163

#### 164 **Creation of Cardiac-Specific mitoNEET-knockout Mice**

165 To establish mice with cardiac-specific deletion of mitoNEET, lox-P and  
166 homologous recombination strategies were used (**Appendix Fig S2A**). As controls, we  
167 generated mitoNEET flox/flox mice in similar manner. Cardiac-specific deletion of  
168 mitoNEET was achieved using  $\alpha$ MHC-Cre (**Appendix Fig S2B**). The cardiac-specific  
169 mitoNEET-knockout mice were viable and fertile, and there were no differences in  
170 appearance, body weight or cardiac phenotype between control and mitoNEET-  
171 knockout mice at a young age (about 3 months). Levels of the mRNA of *CISD1*,  
172 encoding the mitoNEET protein, were significantly lower in the whole heart of  
173 mitoNEET-knockout than control mice (**Appendix Fig S2C**). To characterize the  
174 mitoNEET protein expression, we generated a mitoNEET polyclonal antibody using a  
175 C-terminal fragment of mitoNEET as an antigen. As shown in **Appendix Fig S2D**,  
176 immunoblot, analyzed by Tris-Tricine sodium dodecyl sulfate polyacrylamide gel

177 electrophoresis (SDS-PAGE), confirmed the mitoNEET expression in the hearts of  
178 control mice. The C-terminal fragment of mitoNEET (below 2 kDa) is also shown as a  
179 positive control. As expected, immunoblot analysis revealed that mitoNEET protein  
180 expression was widely detected in the brain, heart, liver, kidney and skeletal muscle of  
181 control mice, but was absent in the hearts of mitoNEET-knockout mice (**Fig 3A**).  
182 Immunohistochemical analysis of mitoNEET expression indicated that mitoNEET was  
183 broadly present in cardiac cells (**Appendix Fig S2E**).

184

### 185 **Interaction between mitoNEET and TfR in mitoNEET-knockout Mice**

186 To confirm the complex formation of other proteins with mitoNEET, we  
187 performed a Blue Native Polyacrylamide Gel Electrophoresis (BN-PAGE) retardation  
188 assay in mitochondrial fractions derived from control mice and mitoNEET-knockout  
189 mice. This assay identified the smear in control mice (**Appendix Fig S3, left lane**). In  
190 contrast, these bands were almost completely absent in mitoNEET-knockout mice,  
191 especially in the range of 50-150 kDa (**Appendix Fig S3, right lane**). This clearly  
192 shows the specific formation of complexes with mitoNEET. TfR expression levels in  
193 the mitochondria from mitoNEET-knockout mice was lower than from control mice,  
194 suggesting that mitoNEET interact with TfR on the OMM *in vivo* (**Fig 3B**).

195

### 196 **mitoNEET Regulates Mitochondrial Iron Contents**

197 The iron contents in isolated mitochondria were significantly higher in  
198 mitoNEET-knockout than control mice (**Fig 3C**). In parallel with the iron contents, the  
199 levels of mitochondrial ferritin, a mitochondrial iron storage protein, was significantly  
200 higher in mitoNEET-knockout than control mice (**Appendix Fig S4A**). However, there

201 was no difference between the two groups in levels of other proteins involved in  
202 mitochondrial iron homeostasis, i.e., mitoferin2 (MFRN2, **Appendix Fig S4B**), frataxin  
203 (FXN, **Appendix Fig S4C**), adenosine triphosphate (ATP)-binding cassette protein B7  
204 (ABCB7, **Appendix Fig S4D**), and ATP-binding cassette protein B8 (ABCB8,  
205 **Appendix Fig S4E**); proteins involved in cytosolic iron homeostasis, i.e., TfR  
206 (**Appendix Fig S4F**), divalent metal transporter 1 (DMT1, **Appendix Fig S4G**), and  
207 ferroportin (Fpn, **Appendix Fig S4H**); proteins involved in cellular iron homeostasis,  
208 i.e., iron regulatory protein 1 (IRP1, **Appendix Fig S4I**) and iron regulatory protein 2  
209 (IRP2, **Appendix Fig S4J**). Heme was not increased in the whole hearts and  
210 mitochondria of mitoNEET-knockout mice (**Appendix Fig S4K, S4L**), and proteins  
211 involved in heme synthesis also did not differ between the groups (**Appendix Fig S4M,**  
212 **S4N**).

213

#### 214 **Deletion of mitoNEET Affects Mitochondrial ROS and Respiration**

215 To assess mitochondrial ROS, we measured the mitochondrial Hydrogen  
216 peroxide (H<sub>2</sub>O<sub>2</sub>) release rate from isolated mitochondria during mitochondrial  
217 respiration. The mitochondrial H<sub>2</sub>O<sub>2</sub> release rate during state 3 with glutamate and  
218 malate (complex I-linked substrates; GM3) was significantly higher in mitoNEET-  
219 knockout than control mice (0.062 ± 0.003 vs. 0.045 ± 0.003 nmol/min/mg  
220 mitochondrial protein, P<0.05, **Fig 3D**). After the addition of carbonyl cyanide-p-  
221 trifluoromethoxyphenylhydrazone (FCCP), an uncoupler, mitochondrial ROS release  
222 during maximal capacity of the electron-transfer system was higher in mitoNEET-  
223 knockout than control mice (0.068 ± 0.004 vs. 0.049 ± 0.004 nmol/min/mg  
224 mitochondrial protein, P<0.05, **Fig 3D**). In contrast to ROS production, mitochondrial

225 state 3 respiration with glutamate and malate was comparable between the mitoNEET-  
226 knockout and control mice ( $620 \pm 120$  vs.  $712 \pm 118$  pmol/s/mg mitochondrial protein,  
227 **Fig 3E**). There was also no significant difference in mitochondrial maximal capacity  
228 between the groups ( $2331 \pm 146$  vs.  $2689 \pm 168$  pmol/s/mg mitochondrial protein, **Fig**  
229 **3E**).

230

### 231 **Deletion of mitoNEET Promotes Mitochondrial and Cardiac Dysfunction by Aging**

232 At the age of 12 months, the iron contents in isolated mitochondria were higher  
233 in mitoNEET-knockout than control mice (**Fig 3F**). Mitochondrial H<sub>2</sub>O<sub>2</sub> release was  
234 significantly higher in mitoNEET-knockout mice than control mice both during state 3  
235 respiration ( $0.080 \pm 0.007$  vs.  $0.049 \pm 0.004$  nmol/min/mg mitochondrial protein,  
236  $P < 0.05$ ) and maximal capacity ( $0.084 \pm 0.007$  vs.  $0.056 \pm 0.005$  nmol/min/mg  
237 mitochondrial protein,  $P < 0.05$ ), respectively (**Fig 3G**). Mitochondrial state 3 respiration  
238 with glutamate and malate was comparable between mitoNEET-knockout and control  
239 mice at 12 months of age ( $545 \pm 52$  vs.  $571 \pm 59$  pmol/s/mg mitochondrial protein, **Fig**  
240 **3H**). In contrast, mitochondrial maximal capacity was significantly lower in mitoNEET-  
241 knockout than control mice at 12 months of age ( $1960 \pm 73$  vs.  $2458 \pm 57$  pmol/s/mg  
242 mitochondrial protein,  $P < 0.05$ , **Fig 3H**). In short, the mitochondrial reserve capacity,  
243 calculated by subtracting state 3 respiration from potential maximum respiratory  
244 capacity, was significantly lower in mitoNEET-knockout than control mice ( $512 \pm 83$  vs.  
245  $1057 \pm 48$  pmol/s/mg mitochondrial protein,  $P < 0.05$ , **Fig 3I**).

246 Cardiac function was evaluated by echocardiography in control and mitoNEET-  
247 knockout mice at 12 months of age. Left ventricle (LV) end-diastolic diameter and LV  
248 end-systolic diameter, each of which typically dilates in the state of cardiac failure, were

249 significantly higher. As a simple and widely used measure of LV contractility, fractional  
250 shortening was significantly lower compared to control mice, suggesting that the heart  
251 of 12 months-old *mitoNEET*-knockout mice had LV dysfunction. LV wall thickness  
252 was not different between 12-month-old control and *mitoNEET*-knockout mice,  
253 representing no evidence of cardiac hypertrophy by deletion of *mitoNEET* (**Fig 4A, 4B**).  
254 Histological analysis showed that myocyte cross-sectional area did not differ between  
255 groups (**Appendix Fig S5A, S5B**).

256

## 257 **Aging Decreases *mitoNEET* Expression and Increases Mitochondrial Iron**

### 258 **Contents**

259 Time course of *mitoNEET* protein expression was examined in the whole heart  
260 of C57BL/6J mice at the ages of 3, 6, 9, and 12 months. The expressions of *mitoNEET*,  
261 which were normalized by GAPDH and cytochrome c oxidase IV (COX IV), were  
262 significantly lower in the 12-month-old than the 3-month-old mice (**Fig 5A, 5B**). This  
263 suggests that *mitoNEET* protein is decreased in the aged heart independently of  
264 mitochondrial quantity. The iron content in isolated mitochondria was higher in 12-  
265 month-old than 3-month-old mice (**Fig 5C**). Moreover, the levels of *mitoNEET* protein  
266 tended to be lower in the kidneys of 12-month-old than in those of 3-month-old mice  
267 (**Appendix Fig S6**).

268

269 **Discussion**

270 The main findings of our study were that the endogenous mitoNEET interacted  
271 with TfR, a carrier protein for transferrin with iron. Interestingly, mitochondrial iron  
272 contents from the hearts of cardiac-specific mitoNEET-knockout mice were higher than  
273 control mice. The increase in mitochondrial iron contents corresponded with increased  
274 mitochondrial ROS release without affecting mitochondrial respiratory function at the  
275 age of 3 months. Therefore, these results suggested that mitoNEET regulated  
276 mitochondrial iron homeostasis by protein-protein interaction with TfR.

277

278 We focused on a newly discovered novel protein, mitoNEET, located at the  
279 OMM (Wiley et al., 2007a). To realize the importance of mitoNEET *in vivo*, we search  
280 for clues from the aspect of protein-protein interactions. Namely mitoNEET were  
281 selected as target protein for its location of TfR (**Fig 1**). We for the first time clarified  
282 that mitoNEET protein interacted with TfR, by using mass spectrometry analysis and  
283 immunoprecipitation (**Fig 1B, 1C, 1D, 1E, 2A, 2B, Appendix Table S1, S2**). TfR  
284 enters the cellular cytosol in the form of the iron-Tf-TfR complex via endocytosis from  
285 the cytoplasmic membrane. To date, TfR has been considered to be in the plasma  
286 membrane and endosomes. On the other hand, we also clearly showed that TfR existed  
287 with the mitochondria facing the OMM (**Fig 2**), even if we did not probe direct  
288 interaction between mitoNEET and TfR. As a previous study said, there are possibility  
289 that mitoNEET indirectly interact with TfR via endosomes containing iron-Tf-TfR  
290 complex (Das et al., 2016). Because of its location, mitoNEET could play a central role  
291 in its complexation with TfR to form TfR-mitoNEET. We propose that mitoNEET may  
292 help TfR to primary function as negative regulator of iron inflow into the mitochondria

293 by its interaction with TfR. In other words, that TfR exists on the mitochondria with  
294 mitoNEET, not in the membrane or cytosol, may limit iron inflow into the mitochondria,  
295 even if the way of its regulation is not elucidated yet.

296 The relation between mitoNEET protein levels and mitochondrial iron contents  
297 does not always reveal the inverse correlation. Because mitochondrial iron  
298 concentrations in mammals need to be tightly regulated, iron increase by mitoNEET  
299 decrease may be compensated by other known regulatory mechanism in mitochondrial  
300 iron homeostasis. Even if that is case, mitoNEET plays a primary role in mitochondrial  
301 iron homeostasis. Next, we created mice with cardiac specific deletion of mitoNEET  
302 (**Fig 3A, Appendix Fig S2**) and clearly demonstrated that absence of mitoNEET  
303 directly increased mitochondrial iron contents (**Fig 3C**). This increase in mitochondrial  
304 iron sustained in 12-months-old mitoNEET-knockout mice as well (**Fig 3F**). Furthermore,  
305 there were no differences in the expressions of proteins known to be involved in  
306 mitochondrial iron homeostasis, suggesting the existence of an undisclosed pathway of  
307 mitochondrial iron homeostasis via mitoNEET. The mitoNEET protein is known to be  
308 an acceptor of ISCs (Wiley et al., 2007b). It has also been proposed that the mitoNEET  
309 protein transfers iron/sulfur clusters by redox regulation, and donates the clusters and  
310 iron ions to mitochondria (Paddock et al., 2007). However, the details of the  
311 mechanisms for the acceptance and donation of iron in the mitoNEET protein have not  
312 been elucidated.

313 In the preset study, under the condition of mitochondrial iron overload with the  
314 deletion of mitoNEET, the increase in ROS release was detected (**Fig 3D**), measured by  
315 using Amplex UltraRed, which was monitored as the fluorescent compound resorufin  
316 after converting superoxide anion ( $O_2^{\cdot-}$ ) into  $H_2O_2$ . Although we could not clarify the

317 cause-and-effect relationship between iron overload and H<sub>2</sub>O<sub>2</sub> release, iron plays a  
318 crucial role in the redox reaction *in vivo*, and its overload can cause free radical  
319 production through many pathways via reduction of O<sub>2</sub>. Moreover, highly reactive ROS  
320 are generated by means of the Fenton reaction in the presence of endogenous iron.  
321 Therefore, mitochondrial iron overload can easily enhance O<sub>2</sub><sup>·-</sup> production via  
322 mitochondrial oxidative phosphorylation (OXPHOS), even if overall mitochondrial  
323 function is preserved (**Fig 3E**). It was consistent with the overall mitochondrial function  
324 and cardiac function in 3-month-old mice (**Fig 3E**). These results suggest that disruption  
325 of mitoNEET primarily causes mitochondrial iron overload and enhances ROS  
326 production, which secondarily leads to mitochondrial dysfunction. Many previous  
327 reports have shown that enhanced ROS production leads to cardiac dysfunction and  
328 development of heart failure (HF). We previously reported that an exposure of H<sub>2</sub>O<sub>2</sub> to  
329 cardiac myocytes lead to their injury (Ide, Tsutsui et al., 1999). Furthermore we  
330 reported that mitochondria-derived ROS production was increased in the heart from HF  
331 model mice (Kinugawa, Tsutsui et al., 2000), and that the treatment with anti-oxidant  
332 and overexpression of mitochondrial antioxidant, such as peroxiredoxin-3, improved  
333 cardiac function and HF (Matsushima, Ide et al., 2006). Therefore, long-term exposure  
334 of ROS over physiological level could lead to cardiac dysfunction. A previous study  
335 reported that strong ROS exposure decreased mitochondrial OXPHOS capacity and  
336 reserve capacity, resulting in cell death (Dranka, Hill et al., 2010). In contrast, mild  
337 ROS exposure decreased mitochondrial reserve capacity, but mitochondrial OXPHOS  
338 capacity was almost constant (Dranka et al., 2010). Although the increase in ROS  
339 release was the same between 3-month-old mice and 12-month-old mice, the  
340 mitochondrial reserve capacity was decreased in 12-month-old mitoNEET-knockout



341 mice, but the mitochondrial OXPHOS capacity was not decreased (**Fig 3G, 3H, 3I**). A  
342 previous study showed that deletion of mitoNEET in the liver after high-fat diet feeding  
343 increased mitochondrial iron contents and mitochondrial respiration (Kusminski et al.,  
344 2012). In contrast, another study reported that the maximal uncoupler-stimulated (state  
345 3u) respiration and complex I-dependent (state 3) respiration were decreased in the  
346 isolated mitochondria from the heart of systemic mitoNEET-knockout mice compared  
347 to WT mice (Wiley et al., 2007a). This data supports our results. The reason for these  
348 discrepancies remains unknown. However, the deletion of mitoNEET can increase  
349 mitochondrial iron contents, and decrease mitochondrial respiration at least in the heart.  
350 In accordance with mitochondrial reserve capacity, chronic ROS exposure caused  
351 cardiac dysfunction (**Fig 4**).

352 Finally, we showed that mitochondrial iron was increased by aging in  
353 association with a decrease in mitoNEET protein (**Fig 5**). This suggests that the  
354 mitoNEET-iron relationship is an important physiological and universal phenomenon,  
355 but not one specific to cardiac diseases. Moreover, in the kidney, the decrease of  
356 mitoNEET expression in aging mice were observed as well, this result also support the  
357 importance of mitoNEET (**Appendix Fig S6**).

358 Mitochondrial iron has been reported to play an important role in some cardiac  
359 diseases. Doxorubicin, an anthracycline antibiotic, is one of the most widely used agents  
360 as chemotherapy for hematological malignancies and solid tumor, which often induces  
361 cardiac dysfunction and HF, i.e. doxorubicin-induced cardiomyopathy (Minotti, Menna  
362 et al., 2004). Previous clinical study showed that levels of mitochondrial iron were  
363 significantly higher in the explanted heart from patients with doxorubicin-induced  
364 cardiomyopathy than in the heart from normal subjects and patients with other

365 cardiomyopathies (Ichikawa, Ghanefar et al., 2014). Increased ROS caused by iron  
366 overload are thought to be its major cause. Thus, mitochondrial iron homeostasis plays  
367 an important role on cardiac function. Its regulation has been controlled by several  
368 proteins in mitochondria. FXN, located in mitochondria matrix, plays a role in synthesis  
369 of iron/sulfur cluster (Vaubel & Isaya, 2013). Friedreich's ataxia (FRDA), a human  
370 genetic disease caused by GAA triplet expansion of FXN gene, leads to hypertrophic  
371 cardiomyopathy, as well as neurodegeneration (Isaya, 2014). Mouse model of FXN  
372 deletion in the heart, which mimic FRDA cardiomyopathy, by gene therapy with adeno-  
373 associated virus rh10 vector expressing human FXN, prevents cardiomyopathy  
374 progressing and also reverse cardiomyopathy with HF (Perdomini, Belbellaa et al.,  
375 2014). In addition, Mice with knockout of ABCB8, which is localized in the inner  
376 mitochondrial membrane and functions as iron exporter from the mitochondrial matrix,  
377 showed the progression of LV dysfunction in association with iron accumulation and an  
378 increase in ROS (Ichikawa et al., 2012). In contrast, iron within mitochondria is used for  
379 the synthase of iron/sulfur clusters and heme. Therefore, mitochondrial iron needs to be  
380 finely controlled under every kind of conditions around mitochondria. In the present  
381 study, we clearly demonstrated that mitoNEET was the regulator of iron homeostasis.

382         In summary, we show that the increase in mitochondrial iron contents  
383 corresponded with increased mitochondrial ROS release in the hearts of cardiac-specific  
384 mitoNEET-knockout mice. The endogenous mitoNEET interacted with TfR, suggesting  
385 that mitoNEET regulated mitochondrial iron homeostasis by protein complex formation.  
386 These results suggest that the regulation of mitochondrial iron would be a potential  
387 target for the treatment of cardiac diseases and other conditions.

388

389 **Methods**

390 All experimental procedures and methods of animal care were approved by the  
391 Institutional Animal Care and Use Committee of National University Corporation  
392 Hokkaido University (Permit Number: 16-0101) and also conformed to the Guide for  
393 the Care and Use of Laboratory Animals published by the US National Institutes of  
394 Health.

395

396 **Immunoblot**

397 Samples, 10-20 µg of total protein from heart tissues, were separated by SDS-  
398 PAGE and transferred to a polyvinylidene fluoride (PVDF) membrane (Bio-Rad, USA).  
399 The membrane was blocked for 1 h at room temperature in TBS-T buffer (Tris buffered  
400 saline containing 0.1% Tween 20) containing 3% BSA or milk, and was incubated with  
401 the primary antibodies at a dilution of 1:1000 overnight at 4°C. After 3 washings with  
402 TBS-T, the membrane was incubated with a horseradish peroxidase-conjugated secondary  
403 antibody at a dilution 1:5000 for 1 h at room temperature. After washing, the membrane  
404 was developed with ECL or ECL Prime Reagent (GE, USA) and then processed for  
405 detection with ChemiDoc XRS+ (Bio-Rad, USA). The density of the signals of bands  
406 was quantified with Image J (NIH) software.

407

408 **Silver-intensified immunogold method for electron microscopy**

409 Cultured C2C12 cells were fixed for 2 hr with 4% paraformaldehyde in 0.1 M  
410 phosphate buffer, pH 7.3. After pretreatment in normal donkey serum for 30 min, they  
411 were incubated with the mouse anti-TfR monoclonal antibody (1: 2000 in dilution,  
412 Thermo Fisher) at 4°C overnight, and subsequently reacted at 4°C overnight with goat

413 anti-mouse IgG covalently linked with 1-nm gold particles (1: 400 in dilution;  
414 Nanoprobes, Yaphank, NY). Following silver enhancement using a kit (HQ silver;  
415 Nanoprobes), the samples were osmificated, dehydrated, and directly embedded in Epon  
416 (Nisshin EM, Tokyo, Japan). Ultrathin sections were prepared and stained with both  
417 uranyl acetate and lead citrate for observation under an electron microscope (H-7100;  
418 Hitachi, Tokyo, Japan).

419

#### 420 **Immunoprecipitation of Endogenous Proteins**

421 To analyze the interaction between endogenous mitoNEET and other proteins,  
422 including TfR, the whole cell lysates from mouse heart were solubilized with lysis  
423 buffer (Cell Signaling Technology, USA). The lysates were centrifuged at 15,000 rpm  
424 for 20 min at 4°C, and then the supernatant fluid was collected. The lysates were mixed  
425 with an anti-TfR Ab (Abcam, UK) and normal rabbit IgG as a control, and incubated  
426 overnight at 4°C. After the addition of protein-A (rProtein A Sepharose Fast Flow, GE,  
427 USA), the lysates were incubated for 4 h at 4°C. Protein-A was washed with buffer (150  
428 mM NaCl, 50 mM Tris-HCl, 0.5% Triton-X) and then mixed with 2 × SDS sample  
429 buffer with boiling for 5 min at 95°C.

430

#### 431 **Cell Culture**

432 The mouse C2C12 myoblast cell line was purchased from the American Type  
433 Culture Collection (Manassas, USA). Mouse C2C12 myoblasts were seeded at a  
434 concentration of  $4 \times 10^5$  cells/ml in 6-well culture plates. Differentiation of C2C12  
435 myoblasts into myotubes was induced by medium containing 2% horse serum for 24 h,  
436 as previously described(Fukushima, Kinugawa et al., 2014).

437

438 **Iron Addition or Reduction for Cells**

439           When mouse C2C12 cells reached confluence, 20  $\mu$ M ferric ammonium citrate  
440 (FAC) (Sigma) in addition to iron, and desferioxamine (DFO) (Sigma) in reduction of  
441 iron, were added 24h.

442

443 **Preparation of Isolated Mitochondria**

444           Heart tissues were quickly harvested, and mitochondria were isolated  
445 (Tonkonogi & Sahlin, 1997). Briefly, heart tissues were minced on ice, and incubated  
446 with mitochondrial isolation buffer containing 0.1 mg/ml proteinase (Sigma-Aldrich,  
447 USA) for 2 min. The heart tissue was gently homogenized with six strokes using a  
448 motor-driven Teflon pestle in glass chamber. The homogenate was centrifuged at 750 *g*  
449 for 10 min. The supernatant was centrifuged at 10,000 *g* for 10 min, and the pellet was  
450 washed and centrifuged at 7,000 *g* for 3 min. The final pellet was suspended in  
451 suspension buffer (containing 225 mmol/l mannitol, 75 mmol/l sucrose, 10 mmol/l Tris,  
452 and 0.1 mmol/l EDTA; pH 7.4). Finally, the mitochondrial protein concentration was  
453 measured using a BCA assay.

454

455 **Digitonin treatment**

456           Digitonin was dissolved in DMSO. To extract cholesterol from the OMM,  
457 isolated mitochondria were incubated for 5 min at room temperature with 0.03 mg/ml  
458 digitonin. To solubilize isolated mitochondria, digitonin at the indicated final  
459 concentrations was added to 100  $\mu$ l of 1.2 mg/ml mitochondria in mitochondrial  
460 suspension buffer (Tris-HCl (pH 7.4), 75 mM sucrose, and 225 mM mannitol). After 5

461 min incubation at room temperature and centrifugation at 10,000 g, the pellet was  
462 suspended in 100 µl of 2 X sample buffer. Equivalent portions of the supernatant and  
463 pellet were subjected to SDS-PAGE and evaluated by immunoblot (Arasaki et al., 2015).

464

#### 465 **Immunohistochemical Staining**

466 For immunohistochemical staining, the mouse C2C12 cells were plated onto  
467 cover-glasses coated with 50 µg/ml fibronectin. After 24-hr incubation at 37°C, the cells  
468 were fixed with 2% formaldehyde in phosphate-buffered saline (PBS) at 37°C for 10  
469 min, followed by ice-cold methanol for a 5-min fixation at -20°C. After blocking with  
470 1% bovine serum albumin (BSA) in PBS for 30 min, the samples were incubated with  
471 antibodies against mitoNEET and TfR in 1% BSA/PBS overnight at 4°C. After being  
472 rinsed with blocking buffer, the samples were incubated with secondary antibodies  
473 conjugated with Alexa Fluor Plus 488 (against rabbit IgG) and Alexa Fluor Plus 555  
474 (against mouse IgG) at a dilution of 1:1000 for 30 min at room temperature.  
475 Fluorescence images were obtained with a structured illumination microscopy (N-SIM,  
476 Nikon, Japan).

477

#### 478 **Experimental Animals**

479 All mice were bred in a pathogen-free environment and housed in an animal  
480 room under controlled condition on a 12 h: 12 h light/dark cycle at a temperature of  
481 23°C to 25°C.

482 C57BL/6J mice (CLEA Japan Inc.) were bred under controlled conditions and  
483 euthanized under deep anesthesia with tribromoethanol-amylene hydrate (Avertin; 250

484 mg/kg body weight, i.p.) (Kinugawa et al., 2000) at the age of 3, 6, 9 or 12 months (n=6,  
485 each). The heart and kidney were excised.

486 Mice with disruption of cardiac-specific *mitoNEET* were newly generated (**Fig**  
487 **S1**). Briefly, the conditional *mitoNEET* allele was created using clones isolated by  
488 restriction mapping with a genome library, and a C57BL/6 genetic background clone  
489 was used to construct the targeting vector. A neo cassette was inserted downstream from  
490 exon 2 and was flanked by FRT sites for later excision by FLP recombinase. The lox-P  
491 sites were inserted upstream from exon 2 and downstream from the neo cassette. The  
492 targeting vector was transfected by electroporation of embryonic stem cells. After  
493 selection, the surviving clones were expanded for polymerase chain reaction analysis to  
494 identify recombinant embryonic stem clones. Targeted embryonic stem cells were  
495 microinjected into C57BL/6 blastocysts, and chimera mice were mated with wild type  
496 C57BL/6 homozygous FLP mice to remove the neo cassette. Heterozygous mice with  
497 neo deletion and confirmed lox-P sites were crossed with C57/BL6 mice to obtain  
498 heterozygous mice. Finally, *mitoNEET* flox/flox mice were also crossed with  $\alpha$ MHC-  
499 Cre mice to obtain cardiac-specific deletion of *mitoNEET* (*mitoNEET*-knockout mice).  
500 *mitoNEET* flox/flox mice were used as control mice. Most of experiments were  
501 performed at the age of 3 months, with others performed at the age of 12 months.

502

### 503 **Measurement of Mitochondrial Iron Contents**

504 Isolated mitochondria, collected by using a Mitochondrial Isolation Kit for  
505 Tissue (Pierce, USA), were diluted with EDTA-free buffer after sonication.  
506 Mitochondrial “non-heme” iron contents were measured by using a commercial Iron  
507 Assay Kit (BioAssay Systems, USA), which directly detect total iron in the sample,

508 according to the manufacturer's protocol(Kusminski et al., 2012). Isolated mitochondria  
509 with sonication were diluted with EDTA-free buffer, and normalized to the  
510 mitochondria concentration of each sample.

511

### 512 **Mitochondrial OXPHOS Capacity and ROS Release**

513 The mitochondrial respiratory capacity was measured in isolated mitochondria at  
514 37°C with a high-resolution respirometer (Oxygraph-2k, Oroboros Instruments, Austria)  
515 (Christiansen, Dela et al., 2015, Takada, Masaki et al., 2016). H<sub>2</sub>O<sub>2</sub> release from  
516 isolated mitochondria was measured at 37°C by spectrofluorometry (O2k-Fluorescence  
517 LED2-Module, Oroboros Instruments, Austria). The release of H<sub>2</sub>O<sub>2</sub> that we measured  
518 reflected intrinsic O<sub>2</sub><sup>·-</sup> and H<sub>2</sub>O<sub>2</sub> release in the mitochondria under the presence of  
519 superoxide dismutase (SOD) (Hey-Mogensen, Hojlund et al., 2010). O<sub>2</sub><sup>·-</sup>, unstable  
520 substance, needs to be converted into H<sub>2</sub>O<sub>2</sub>, relatively stable one, to evaluate ROS  
521 production. H<sub>2</sub>O<sub>2</sub> reacts with Amplex UltraRed (Life Technologies, USA) in an equal  
522 amount of stoichiometry catalyzed by horseradish peroxidase, which yields the  
523 fluorescent compound resorufin (excitation: 560 nm; emission: 590 nm). Resorufin was  
524 monitored throughout the experiment. Beforehand five different concentrations of H<sub>2</sub>O<sub>2</sub>  
525 were added to establish a standard curve in advance. The H<sub>2</sub>O<sub>2</sub> release rate from  
526 isolated mitochondria is expressed as nanomoles per minute per milligram of  
527 mitochondrial protein.

528 After the addition of isolated mitochondria (approximately 100-200 µg) to the  
529 chamber in the respirometer filled with 2 ml of MiR05 medium with 5 U/ml SOD, 25  
530 µmol/l Amplex ultrared, and 1 U/ml horseradish peroxidase, substrates, adenosine  
531 diphosphate (ADP), and inhibitors were added in the following order: 1) glutamate 10



532 mmol/l + malate 2 mmol/l (complex I-linked substrates), 2) ADP 10 mmol/l, 3)  
533 succinate 10 mmol/l (a complex II-linked substrate), 4) oligomycin 2.5  $\mu$ mol/l, 5) FCCP  
534 1  $\mu$ mol/l, 6) rotenone 0.5  $\mu$ mol/l, 7) antimycin a 2.5  $\mu$ mol/l. O<sub>2</sub> consumption rates, i.e.,  
535 respiratory rates, were expressed as O<sub>2</sub> flux normalized to mitochondrial protein  
536 concentration ( $\mu$ g/ $\mu$ l). Datlab software (Oroboros Instruments) was used for data  
537 acquisition and data analysis.

538

### 539 **Echocardiographic Measurements**

540 Echocardiographic measurements were performed under light anesthesia with  
541 tribromoethanol/amylene hydrate (avertin; 2.5% wt/vol, 8  $\mu$ L/g i.p.). Two-dimensional  
542 parasternal short-axis views were obtained at the levels of the papillary muscles. Two-  
543 dimensional targeted M-mode tracings were recorded at a paper speed of 50 mm/sec.

544

### 545 **Statistical Analysis**

546 Data are expressed as the mean  $\pm$  the standard error of the mean (SE). Student's  
547 unpaired *t*-tests were performed to compare means between two independent groups.  
548 One-way ANOVA followed by the Tukey's test was performed for multiple-group  
549 comparisons of means. Values of  $P < 0.05$  were considered statistically significant.

550

551

552 **Acknowledgements**

553 We thank Yuki Kimura, Noriko Ikeda and Miwako Yamane for their technical  
554 assistance. This work was supported in part by grants from Japanese Grant-In-Aid for  
555 Scientific Research (JP17K15979 (T.F.), JP17K10137 (A.F.), JP17H04758 (S.T.),  
556 18K08022 (T.Y.), 18H03187 (S.K.), 26350879 (S.K.), 15H04815 (H.T.)), the Japanese  
557 Association of Cardiac Rehabilitation (T.F.), Hokkaido Heart Association Grant for  
558 Research (T.F., S.T.), Suhara Memorial Foundation (S.K), the Mochida Memorial  
559 Foundation for Medical and Pharmaceutical Research (T.Y.), the Nakatomi Foundation  
560 (T.Y.), the Japan Foundation for Applied Enzymology (S.T.), Northern Advancement  
561 Center for Science & Technology (S.T.), Japan Heart Foundation & Astellas Grant for  
562 Research on Atherosclerosis Update (S.T.), MSD Life Science Foundation (S.T.),  
563 Uehara Memorial Foundation (S.T.), Cardiovascular Research Fund, Tokyo, Japan  
564 (S.T.), SENSHIN Medical Research Foundation (S.T.), the Nakatomi Foundation (S.T.),  
565 Japan Heart Foundation (S.T.), the Sasakawa Scientific Research Grant from The Japan  
566 Science Society (S.T.).

567

568 **Author contributions**

569 T.F., S.T. and S.K. designed the study. M.W., H.T., S.H., M.M. and K.I.N.  
570 performed Mass Spectrometry Analysis. N.K., Y.O., H.S. performed IHC analysis. J.N-  
571 K and T.I performed immune electron microscopy. T.F., S.T., S.M., A.F., M.T., and  
572 J.M. performed the other experiments. T.F. and S.K. wrote the manuscript with help  
573 from T.Y., S.M., and H.T.

574

575 **Conflict of interest**

576 The authors have no conflicts of interest to disclose.

577

578

579

580 **Reference**

- 581 Anderson CP, Shen M, Eisenstein RS, Leibold EA (2012) Mammalian iron metabolism  
582 and its control by iron regulatory proteins. *Biochim Biophys Acta* 1823: 1468-83
- 583 Anderson GJ, Vulpe CD (2009) Mammalian iron transport. *Cell Mol Life Sci* 66: 3241-  
584 61
- 585 Arasaki K, Shimizu H, Mogari H, Nishida N, Hirota N, Furuno A, Kudo Y, Baba M,  
586 Baba N, Cheng J, Fujimoto T, Ishihara N, Ortiz-Sandoval C, Barlow LD, Raturi A,  
587 Dohmae N, Wakana Y, Inoue H, Tani K, Dacks JB et al. (2015) A role for the ancient  
588 SNARE syntaxin 17 in regulating mitochondrial division. *Dev Cell* 32: 304-17
- 589 Bagh MB, Thakurta IG, Biswas M, Behera P, Chakrabarti S (2011) Age-related  
590 oxidative decline of mitochondrial functions in rat brain is prevented by long term oral  
591 antioxidant supplementation. *Biogerontology* 12: 119-31
- 592 Branda SS, Cavadini P, Adamec J, Kalousek F, Taroni F, Isaya G (1999) Yeast and  
593 human frataxin are processed to mature form in two sequential steps by the  
594 mitochondrial processing peptidase. *J Biol Chem* 274: 22763-9
- 595 Christiansen LB, Dela F, Koch J, Hansen CN, Leifsson PS, Yokota T (2015) Impaired  
596 cardiac mitochondrial oxidative phosphorylation and enhanced mitochondrial oxidative  
597 stress in feline hypertrophic cardiomyopathy. *Am J Physiol Heart Circ Physiol* 308:  
598 H1237-47
- 599 Dai DF, Rabinovitch PS (2009) Cardiac aging in mice and humans: the role of  
600 mitochondrial oxidative stress. *Trends Cardiovasc Med* 19: 213-20
- 601 Das A, Nag S, Mason AB, Barroso MM (2016) Endosome-mitochondria interactions  
602 are modulated by iron release from transferrin. *J Cell Biol* 214: 831-45

603 Dranka BP, Hill BG, Darley-USmar VM (2010) Mitochondrial reserve capacity in  
604 endothelial cells: The impact of nitric oxide and reactive oxygen species. *Free Radic*  
605 *Biol Med* 48: 905-14

606 Fukushima A, Kinugawa S, Takada S, Matsushima S, Sobirin MA, Ono T, Takahashi M,  
607 Suga T, Homma T, Masaki Y, Furihata T, Kadoguchi T, Yokota T, Okita K, Tsutsui H  
608 (2014) (Pro)renin receptor in skeletal muscle is involved in the development of insulin  
609 resistance associated with postinfarct heart failure in mice. *Am J Physiol Endocrinol*  
610 *Metab* 307: E503-14

611 Ganz T (2013) Systemic iron homeostasis. *Physiol Rev* 93: 1721-41

612 Gkouvatsos K, Papanikolaou G, Pantopoulos K (2012) Regulation of iron transport and  
613 the role of transferrin. *Biochim Biophys Acta* 1820: 188-202

614 Hey-Mogensen M, Hojlund K, Vind BF, Wang L, Dela F, Beck-Nielsen H, Fernstrom  
615 M, Sahlin K (2010) Effect of physical training on mitochondrial respiration and reactive  
616 oxygen species release in skeletal muscle in patients with obesity and type 2 diabetes.  
617 *Diabetologia* 53: 1976-85

618 Ichikawa Y, Bayeva M, Ghanefar M, Potini V, Sun L, Mutharasan RK, Wu R,  
619 Khechaduri A, Jairaj Naik T, Ardehali H (2012) Disruption of ATP-binding cassette B8  
620 in mice leads to cardiomyopathy through a decrease in mitochondrial iron export. *Proc*  
621 *Natl Acad Sci U S A* 109: 4152-7

622 Ichikawa Y, Ghanefar M, Bayeva M, Wu R, Khechaduri A, Naga Prasad SV,  
623 Mutharasan RK, Naik TJ, Ardehali H (2014) Cardiotoxicity of doxorubicin is mediated  
624 through mitochondrial iron accumulation. *J Clin Invest* 124: 617-30

625 Ide T, Tsutsui H, Kinugawa S, Utsumi H, Takeshita A (1999) Amiodarone protects  
626 cardiac myocytes against oxidative injury by its free radical scavenging action.  
627 *Circulation* 100: 690-2

628 Ikeuchi M, Matsusaka H, Kang D, Matsushima S, Ide T, Kubota T, Fujiwara T,  
629 Hamasaki N, Takeshita A, Sunagawa K, Tsutsui H (2005) Overexpression of  
630 mitochondrial transcription factor a ameliorates mitochondrial deficiencies and cardiac  
631 failure after myocardial infarction. *Circulation* 112: 683-90

632 Isaya G (2014) Mitochondrial iron-sulfur cluster dysfunction in neurodegenerative  
633 disease. *Front Pharmacol* 5: 29

634 Khechaduri A, Bayeva M, Chang HC, Ardehali H (2013) Heme levels are increased in  
635 human failing hearts. *J Am Coll Cardiol* 61: 1884-93

636 Kinugawa S, Tsutsui H, Hayashidani S, Ide T, Suematsu N, Satoh S, Utsumi H,  
637 Takeshita A (2000) Treatment with dimethylthiourea prevents left ventricular  
638 remodeling and failure after experimental myocardial infarction in mice: role of  
639 oxidative stress. *Circ Res* 87: 392-8

640 Kusminski CM, Holland WL, Sun K, Park J, Spurgin SB, Lin Y, Askew GR, Simcox  
641 JA, McClain DA, Li C, Scherer PE (2012) MitoNEET-driven alterations in adipocyte  
642 mitochondrial activity reveal a crucial adaptive process that preserves insulin sensitivity  
643 in obesity. *Nat Med* 18: 1539-49

644 Kwong LK, Sohal RS (2000) Age-related changes in activities of mitochondrial electron  
645 transport complexes in various tissues of the mouse. *Arch Biochem Biophys* 373: 16-22

646 Li H, Kumar Sharma L, Li Y, Hu P, Idowu A, Liu D, Lu J, Bai Y (2013) Comparative  
647 bioenergetic study of neuronal and muscle mitochondria during aging. *Free Radic Biol*  
648 *Med* 63: 30-40

649 Matsushima S, Ide T, Yamato M, Matsusaka H, Hattori F, Ikeuchi M, Kubota T,  
650 Sunagawa K, Hasegawa Y, Kurihara T, Oikawa S, Kinugawa S, Tsutsui H (2006)  
651 Overexpression of mitochondrial peroxiredoxin-3 prevents left ventricular remodeling  
652 and failure after myocardial infarction in mice. *Circulation* 113: 1779-86  
653 Minotti G, Menna P, Salvatorelli E, Cairo G, Gianni L (2004) Anthracyclines:  
654 molecular advances and pharmacologic developments in antitumor activity and  
655 cardiotoxicity. *Pharmacol Rev* 56: 185-229  
656 Oliveira F, Rocha S, Fernandes R (2014) Iron metabolism: from health to disease. *J*  
657 *Clin Lab Anal* 28: 210-8  
658 Paddock ML, Wiley SE, Axelrod HL, Cohen AE, Roy M, Abresch EC, Capraro D,  
659 Murphy AN, Nechushtai R, Dixon JE, Jennings PA (2007) MitoNEET is a uniquely  
660 folded 2Fe 2S outer mitochondrial membrane protein stabilized by pioglitazone. *Proc*  
661 *Natl Acad Sci U S A* 104: 14342-7  
662 Paradkar PN, Zumbrennen KB, Paw BH, Ward DM, Kaplan J (2009) Regulation of  
663 mitochondrial iron import through differential turnover of mitoferrin 1 and mitoferrin 2.  
664 *Mol Cell Biol* 29: 1007-16  
665 Perdomini M, Belbellaa B, Monassier L, Reutenauer L, Messaddeq N, Cartier N,  
666 Crystal RG, Aubourg P, Puccio H (2014) Prevention and reversal of severe  
667 mitochondrial cardiomyopathy by gene therapy in a mouse model of Friedreich's ataxia.  
668 *Nat Med* 20: 542-7  
669 Richardson DR, Lane DJ, Becker EM, Huang ML, Whitnall M, Suryo Rahmanto Y,  
670 Sheftel AD, Ponka P (2010) Mitochondrial iron trafficking and the integration of iron  
671 metabolism between the mitochondrion and cytosol. *Proc Natl Acad Sci U S A* 107:  
672 10775-82

- 673 Rosca MG, Hoppel CL (2010) Mitochondria in heart failure. *Cardiovasc Res* 88: 40-50
- 674 Srinivasan V, Pierik AJ, Lill R (2014) Crystal structures of nucleotide-free and  
675 glutathione-bound mitochondrial ABC transporter Atm1. *Science* 343: 1137-40
- 676 Suematsu N, Tsutsui H, Wen J, Kang D, Ikeuchi M, Ide T, Hayashidani S, Shiomi T,  
677 Kubota T, Hamasaki N, Takeshita A (2003) Oxidative stress mediates tumor necrosis  
678 factor-alpha-induced mitochondrial DNA damage and dysfunction in cardiac myocytes.  
679 *Circulation* 107: 1418-23
- 680 Sugiyama S, Takasawa M, Hayakawa M, Ozawa T (1993) Changes in skeletal muscle,  
681 heart and liver mitochondrial electron transport activities in rats and dogs of various  
682 ages. *Biochem Mol Biol Int* 30: 937-44
- 683 Takada S, Masaki Y, Kinugawa S, Matsumoto J, Furihata T, Mizushima W, Kadoguchi  
684 T, Fukushima A, Homma T, Takahashi M, Harashima S, Matsushima S, Yokota T,  
685 Tanaka S, Okita K, Tsutsui H (2016) Dipeptidyl peptidase-4 inhibitor improved  
686 exercise capacity and mitochondrial biogenesis in mice with heart failure via activation  
687 of glucagon-like peptide-1 receptor signalling. *Cardiovasc Res* 111: 338-47
- 688 Tonkonogi M, Sahlin K (1997) Rate of oxidative phosphorylation in isolated  
689 mitochondria from human skeletal muscle: effect of training status. *Acta Physiol Scand*  
690 161: 345-53
- 691 Vaubel RA, Isaya G (2013) Iron-sulfur cluster synthesis, iron homeostasis and oxidative  
692 stress in Friedreich ataxia. *Mol Cell Neurosci* 55: 50-61
- 693 Vigani G, Tarantino D, Murgia I (2013) Mitochondrial ferritin is a functional iron-  
694 storage protein in cucumber (*Cucumis sativus*) roots. *Front Plant Sci* 4: 316



695 Wiley SE, Murphy AN, Ross SA, van der Geer P, Dixon JE (2007a) MitoNEET is an  
696 iron-containing outer mitochondrial membrane protein that regulates oxidative capacity.  
697 *Proc Natl Acad Sci U S A* 104: 5318-23

698 Wiley SE, Paddock ML, Abresch EC, Gross L, van der Geer P, Nechushtai R, Murphy  
699 AN, Jennings PA, Dixon JE (2007b) The outer mitochondrial membrane protein  
700 mitoNEET contains a novel redox-active 2Fe-2S cluster. *J Biol Chem* 282: 23745-9

701 Wittig I, Braun HP, Schagger H (2006) Blue native PAGE. *Nat Protoc* 1: 418-28

702 Yamamoto A, Takeya R, Matsumoto M, Nakayama KI, Sumimoto H (2013)  
703 Phosphorylation of Nox1 at threonine 341 regulates its interaction with Noxa1 and the  
704 superoxide-producing activity of Nox1. *FEBS J* 280: 5145-59

705

706 **Figure Legends**

707

708 **Figure 1. The Role of mitoNEET in Mitochondrial Iron Homeostasis.**

709 (A) Immunoblot of supernatant and pellet from mitochondrial fractions of the mouse  
710 heart. (B) Electron microscopy of TfR in C2C12 cells. In upper panel, Gold particles,  
711 black dots in figures, showing the existence of TfR are broadly distributed throughout  
712 the cytoplasm but tend to be condensed around vacuoles (arrows) and mitochondria.  
713 Lower panel shows an intimate relationship of gold particles with a long mitochondrion.  
714 Bar, 0.5  $\mu$ m. (C) Silver-stained gels with the immunoprecipitated protein by TfR  
715 antibody in the mitochondrial protein from the mouse heart (black arrows). (D) Venn  
716 diagram showing the central role of mitoNEET in new mitochondrial iron regulation  
717 involved in iron metabolism, outer mitochondrial proteins, and iron sulfur-cluster(ISC).  
718 (E) Silver-stained gels with the immunoprecipitated protein from HEK 293 cells  
719 transfected with and without 3 $\times$ FLAG-mitoNEET containing the pcDNA3 promoter.  
720 (F) Interaction of endogenous TfR and mitoNEET. The whole cell lysate of the mouse  
721 heart was subjected to immunoprecipitation with anti-TfR antibody or normal rabbit  
722 IgG followed by immunoblot with mitoNEET antibody. An input representing 5  $\mu$ g of  
723 the whole cell lysate was used for each immunoprecipitation. (G) Interaction of  
724 endogenous mitoNEET and TfR. (H) Representative immunoblot and summary data of  
725 mitoNEET protein expression normalized to beta-actin in mouse C2C12 cells in the  
726 addition of iron or the reduction of iron with DFO compared to control. Data are shown  
727 as the mean  $\pm$  SE. n=7. \*P<0.05 vs. Ctrl. (I) Correlation between mitochondrial  
728 respiration and mitoNEET protein expression normalized to beta-actin.

729 WCL, whole cell lysate; IB, immunoblot; IP, immunoprecipitation; TfR, transferrin  
730 receptor; mNT, mitoNEET; M, mitochondria; Ctrl, control; Fe, the addition of ferric  
731 ammonium citrate; DFO, desferioxamine.

732

733 **Figure 2. The Colocalization of mitoNEET and Transferrin Receptor on the Outer**  
734 **Mitochondrial Membrane.**

735 (A) Interaction of mitoNEET and TfR with mitochondria of the mouse heart. An input  
736 representing 100 µg of the mitochondria lysate was used. (B) Immunoblot of  
737 supernatant and pellet from mitochondrial fractions after digitonin treatment with the  
738 indicated concentrations. (C) Representative images obtained from structured  
739 illumination microscopy of C2C12 cell stained for mitoNEET and TfR. mitoNEET  
740 (green) and TfR (red) visualized using Alexa Fluoro Plus 488 and Alexa Fluoro Plus  
741 555. Left, C2C12 cell imaged with 488 nm filter. Center, C2C12 cell imaged with 555  
742 nm filter. Right, merged image. Bar, 10 µm.

743 IB, immunoblot; IP, immunoprecipitation; KO, knockout; mNT, mitoNEET; TfR,  
744 transferrin receptor; ANT, adenine nucleotide translocator; WCL, whole cell lysate; Sup,  
745 supernatant; PPT, pellet; VDAC, voltage-dependent anion channel; HSP60, heat-shock  
746 protein 60; Ctrl, control; Fe, the addition of ferric ammonium citrate.

747

748 **Figure 3. Mitochondrial Iron, ROS, and Respiration in the Heart of mitoNEET-**  
749 **knockout mice.**

750 (A) Representative immunoblot of the mitoNEET protein in various organs from  
751 mitoNEET-knockout mice and control mice. (B) Representative immunoblot of the  
752 transferrin receptor protein from control mice (n=6) and mitoNEET-konckout (n=6)

753 mice in the mitochondrial fraction of the heart normalized to COX IV. (C) Levels of  
754 mitochondrial iron contents in 3-month-old *mitoNEET*-knockout mice relative to  
755 control mice (n=8-9). (D) H<sub>2</sub>O<sub>2</sub> release originating from isolated mitochondria in the  
756 heart of 3-month-old control mice (n=5) and 3-month-old *mitoNEET*-knockout mice  
757 (n=5) during state 3 respiration with complex I-linked substrates (left bars) and in  
758 maximal capacity of an electron-transfer system with FCCP (right bars). (E)  
759 Mitochondrial respiration in isolated mitochondria from the heart of 3-month-old mice  
760 during state 3 with complex I-linked substrates (left bars) and maximal capacity of the  
761 electron-transfer system with FCCP (right bars). (F) Levels of mitochondrial iron  
762 contents in 12-month-old *mitoNEET*-knockout mice relative to 12-month-old control  
763 mice (n=11-14). (G) H<sub>2</sub>O<sub>2</sub> release in 12-month-old control mice (n=5) and 12-month-  
764 old *mitoNEET*-knockout mice (n=5). (H) Mitochondrial respiration in isolated  
765 mitochondria from the heart of 12-month-old mice. (I) Reserve capacity in 12-month-  
766 old control mice (left bar) and *mitoNEET*-knockout mice (right bar).  
767 mNT, *mitoNEET*; GAPDH, glyceraldehyde phosphate dehydrogenase; B, brain; H,  
768 heart; Li, liver; K, kidney; SM, skeletal muscle; COX, cytochrome c oxidase; M, month.  
769 GM3, state 3 respiration with glutamate and malate; FCCP, carbonyl cyanide-p-  
770 trifluoromethoxyphenylhydrazone.

771

772 **Figure 4. Cardiac Function of 12-month-old *mitoNEET*-knockout mice assessed by**  
773 **Echocardiography.**

774 (A) Representative echocardiography; Control mice(left panel) and *mitoNEET*-  
775 knockout mice (right panel) at the age of 12 months. (B) Summary data of LVEDD

776 (mm), LVESD (mm), %FS, and LV wall thickness in 12-month-old control and  
777 *mitoNEET*-knockout mice.

778 Data are shown as the mean  $\pm$  SE. \* $P < 0.05$  vs. the Control. LV, left ventricle; EDD,  
779 end-diastolic diameter; ESD, end-systolic diameter; %FS, percent fractional shortening.  
780

781 **Figure 5. Expression of *mitoNEET* and Accumulation of Mitochondrial Iron in 12-**  
782 **Month Old C57B6/J Mice.**

783 Representative immunoblot and summary data of *mitoNEET* protein expression  
784 normalized to GAPDH (A) and COX IV (B) in the hearts of 3, 6, 9, and 12-month old  
785 mice. (C) Levels of mitochondrial iron contents in 12-month old mice relative to 3-  
786 month old mice.

787 Data are shown as the mean  $\pm$  SE.  $n = 5-6$ . \* $P < 0.05$  vs. 3M. M, month; mNT,  
788 *mitoNEET*; GAPDH, glyceraldehyde phosphate dehydrogenase; COX, cytochrome c  
789 oxidase.

790

791 **Figure 6. A schematic mechanism of iron overload in *mitoNEET*-knockout mice.**

792 The interaction between *mitoNEET* and transferrin receptor causes *mitoNEET* to be  
793 colocalize with transferrin receptor, which in control limits inflow of iron. In contrast,  
794 the absence of *mitoNEET* in *mitoNEET*-knockout mice increases inflow of iron, for  
795 transferrin receptor was separated from mitochondrial outer membrane, leading to  
796 mitochondrial iron overload and consequently enhancing mitochondrial ROS production.  
797 ROS, reactive oxygen species.

798

799 **Appendix**

800

801 **Methods**

802

803 **Mass Spectrometry Analysis**

804 HEK 293 cells were transfected with or without expressed  $3 \times$  FLAG-  
805 mitoNEET under the control of a cytomegalovirus constitutive promoter in the pcDNA3  
806 expression vector. The cells were lysed, and the lysate was centrifuged. The resultant  
807 supernatant was incubated at 4°C with the antibody to FLAG (M2, Sigma-Aldrich,  
808 USA) immobilized on protein-A (rProtein A Sepharose Fast Flow, GE, USA), and the  
809 beads were washed with the lysis buffer. The immunoprecipitated proteins were eluted  
810 with the  $3 \times$  FLAG peptide (Sigma-Aldrich, USA).

811 The proteins collected proteins by immunoprecipitation were separated by SDS-  
812 PAGE gel and stained with silver staining. These silver-stained bands were excised  
813 from the gels. The proteins therein were subjected to in-gel reduction, S-  
814 carboxyamidomethylation and digestion with sequence-grade trypsin (Promega,  
815 Fitchburg). The resultant peptides were analyzed by LCESI-MS/MS (LCQ DECA and  
816 LTQ XL; Thermo Fisher Scientific, USA). The data were analyzed using Mascot  
817 software (Matrix Science, USA) (Yamamoto, Takeya et al., 2013).

818

819 **Genotyping for mitoNEET KO Mice**

820 Genotyping of mitoNEET KO mice was performed by PCR with DNA extracted  
821 from the tail. To detect the Cre recombinase, the following primers were used: 5'-  
822 CTGAAAAGTTAACCAGGTGAGAATG -3' (forward) and 5'-

823 AGGTAGTTATTCGGATCATCAGCTA -3' (reverse). To distinguish mitoNEET  
824 flox/flox or wild type, the following primers were used: 5'-  
825 TCTAAAATGTACAGCAGCCATGAAG -3' (forward) and 5'-  
826 ACCAAGATACTTAGCGGTAGAAGTG -3' (reverse). The protocol of PCR  
827 amplification was as follows: 35 cycles of 10 sec at 98 °C, 5 sec at 65 °C, and 120 sec at  
828 72 °C; followed by 35 cycles of 10 sec at 98 °C, 5 sec at 66 °C, and 60 sec at 72 °C,  
829 respectively.

830

### 831 **Quantitative Reverse Transcriptase PCR**

832 Total RNA was extracted from heart tissues with QuickGene-810 (FujiFilm,  
833 Japan) according to the manufacturer's instructions. The total RNA concentration and  
834 purity were assessed by measuring the optical density (230, 260, and 280 nm) with a  
835 Nanodrop 1000 Spectrophotometer (Thermo Fisher Scientific, USA). cDNA was  
836 synthesized with a high capacity cDNA reverse transcription kit (Applied Biosystems,  
837 USA). Reverse transcription was performed for 10 min at 25°C, for 120 min at 37°C,  
838 for 5 sec at 85°C, and then solution was cooled at 4°C. TaqMan quantitative realtime  
839 PCR was performed with the 7300 real-time PCR system (Applied Biosystems) to  
840 amplify samples for *Cisd1* (Mm01172641\_g1) cDNA in the heart. After 2 min at 50°C  
841 and 10 min at 95°C, the PCR amplification was performed for 40 cycles of 15 sec at  
842 95°C and 1 min at 60°C. GAPDH was used as an internal control. Data were analyzed  
843 using a comparative  $2^{-\Delta\Delta CT}$  method.

844

### 845 **Generation of mitoNEET Antibody**

846 The peptide antigen, a C-terminal fragment of mitoNEET, was chemically  
847 synthesized. Samples using the peptide were injected into 4-month-old female New  
848 Zealand white rabbits. After multiple immunizations, the blood samples were collected  
849 from the ear vein of the rabbits. The generation of antibodies was examined by  
850 immunoblot, and levels of anti-peptide antibody were determined with the conventional  
851 ELISA method.

852

### 853 **Blue Native Page Electrophoresis (BN-PAGE)**

854 BN-PAGE was performed as previously described (Wittig, Braun et al., 2006).  
855 The proteins from the whole heart were extracted with 5% digitonin (Invitrogen)  
856 (protein : detergent ratio of 1 : 10) and 4 × buffer on ice for 30 min. After centrifugation  
857 at 10,000 g for 10 min at 4 °C, the supernatants were collected. The remaining lysate  
858 was combined with Coomassie blue G-250 dye (Invitrogen) (protein : detergent ratio of  
859 1 : 10) and added to 3-12% NativePAGETM Novex Bis-Tris Gel (Invitrogen), then  
860 separated electrophoretically by SDS-PAGE using an Anode and Cathode buffer  
861 (Invitrogen) at 10 mA for 1 h and at 150V for 2 h on ice. The protein complex in the  
862 samples after SDS-PAGE was denatured by denaturing buffer (in mmol; Tris 20,  
863 glycine 200, 1% SDS). Then the gels were transferred by electroblotting to PVDF  
864 membranes (Bio-Rad) using transfer buffer at 30 V for 3 h.

865

### 866 **Measurement of Heme**

867 About 2-3 mg of heart tissue was homogenized in 1% Triton-X100 in Tris-  
868 buffered saline and centrifuged at 5,000 g for 10 min. The supernatants were collected,  
869 the lysate for total heme measurement was prepared and then the protein concentration



870 was quantified by BCA assay. The lysate for mitochondrial heme measurement was  
871 prepared using a Mitochondrial Isolation Kit for Tissue (Pierce, USA).  
872 Levels of total and mitochondrial heme were quantified as previously  
873 described(Khechaduri, Bayeva et al., 2013). Briefly, equal amounts of total or  
874 mitochondrial proteins were mixed with 2 M oxalic acid and boiled to 95°C for 30 min.  
875 After centrifugation at 1,000 g for 10 min at 4°C, the supernatants containing release  
876 iron from heme and generated fluorescent PPIX were collected. The fluorescence of the  
877 supernatant was assessed at 405 nm/600 nm on a Spectra Max Gemini fluorescence  
878 microplate reader, which was normalized to the protein concentration of each sample.  
879

## 880 **Organ Histology**

881 For histological analysis, tissue was fixed in 10% formaldehyde, cut into three  
882 transverse sections; apex, middle ring, and base, then stained with hematoxylin-eosin.  
883 Myocyte cross-sectional area was determined as described previously(Kinugawa et al.,  
884 2000).  
885

886 **Figure Legends**

887

888 **Appendix Figure S1. Mitochondrial Iron Contents Influenced by Iron or DFO.**

889 Representative images obtained from super-resolution microscopy by using Mito-  
890 ferroGreen (Dojindo, Japan). Bar, 50  $\mu$ m.

891 DFO, desferioxamine; Fe, the addition of ferric ammonium citrate.

892

893 **Appendix Figure S2. Generation of mitoNEET KO Mice.**

894 (A) Design of the mitoNEET targeting construct and the genomic structure of the  
895 mitoNEET. LoxP sites were inserted to delete the entire exon 2, resulting in early  
896 termination and truncation of the C-terminal region of mitoNEET. This resulted in the  
897 complete destruction of mitoNEET function. The indicated primers were used for  
898 detecting mitoNEET floxed allele. (B) WT and mitoNEET floxed alleles were  
899 distinguished by polymerase chain reaction (PCR) analysis. Genomic PCR confirmed  
900 the mitoNEET floxed alleles and Cre allele in mitoNEET-knockout mice. (C)

901 Quantitative analysis of the gene expression of *CISDI* in the heart (n=10-11). Data are  
902 shown as the mean  $\pm$  SE. \*P<0.05 vs. Control. (D) Representative immunoblot by Tris-  
903 Tricine SDS-PAGE of the lysate from control (Ctrl) and mitoNEET-knockout mice  
904 (KO), and the peptide of the mitoNEET fragment as positive control (PC). The black  
905 arrow (about 14 kDa) indicates mitoNEET, and the white arrow (below 2 kDa) indicates  
906 mitoNEET fragment as PC. (E) Representative positive immunostaining for mitoNEET  
907 in myocardial sections. Upper Panel: Control; Lower Panel: mNT KO. Scale Bar, 50  $\mu$ m.  
908 WT, wild-type; mNT KO, mitoNEET-knockout; *CISDI*, CDGSH iron sulfur domain 1;

909 CZ, cruz marker; PC, positive control; Ctrl, control; CM, color marker; GAPDH,  
910 glyceraldehyde phosphate dehydrogenase.

911

912 **Appendix Figure S3. Complex of mitoNEET in mitoNEET-knockout mice.**

913 (A) Representative BN-PAGE retardation assays performed on the whole cell lysate  
914 from the heart of control mice or mitoNEET-knockout mice. Black arrows (about 120  
915 kDa) indicate the complex consisting of mitoNEET and TfR. IB, immunoblot; IP,  
916 immunoprecipitation; KO, knockout.

917

918 **Appendix Figure S4. Proteins Related to Iron Homeostasis and Levels of Heme  
919 and Expression of Proteins Related to Heme Synthesis in the Heart of 3 Months-  
920 Old mitoNEET-knockout mice.**

921 Representative immunoblot and summary data of FtMt (A), MFRN2 (B), FXN (C),  
922 ABCB7 (D), ABCB8 (E), TfR (F), DMT1 (G), Fpn (H), IRP1 (I), and IRP2 (J) protein  
923 expressions normalized to GAPDH in the heart from control and mitoNEET KO mice  
924 (n=10-11). Levels of total heme (K) and mitochondrial heme (L) in mitoNEET KO  
925 mice relative to control mice (n=7-9). Representative immunoblot and summary data of  
926 ALAS1 (M) and FECH (N) protein expressions normalized to GAPDH in the heart  
927 from control and mitoNEET KO mice (n=10-11). Data are shown as the mean  $\pm$  SE.

928 \*P<0.05 vs. Control. Ctrl, control; NS, not significant; FtMt, mitochondrial ferritin;  
929 MFRN2, mitoferin2; FXN, frataxin; ABCB7, ATP-binding cassette protein B7; ABCB8,  
930 ATP-binding cassette protein B8; TfR, transferrin receptor; DMT1, divalent metal  
931 transporter 1; Fpn, ferroportin; IRP1, iron regulatory protein 1; IRP2, iron regulatory

932 protein 2; ALAS1, 5'-aminolevulinate synthase 1; FECH, ferrochelatase; GAPDH,

933 glyceraldehyde phosphate dehydrogenase.

934

935 **Appendix Figure S5. Representative Histological Images of the Heart.**

936 (A) Representative Hematoxylin and eosin (HE) stains from 12-month old control mice

937 and 12-month old mitoNEET-knockout mice. Scale Bar, 100 $\mu$ m. (B) Summary data for

938 cross sectional area. n=3 for each.

939

940 **Appendix Figure S6. Expression of mitoNEET in the kidney of 12-Month Old**

941 **C57B6/J Mice.**

942 (A) Representative immunoblot and summary data of mitoNEET protein expression

943 normalized to GAPDH in the kidneys of 3 and 12-month old mice. Data are shown as

944 the mean  $\pm$  SE. n=5-6. \*P<0.05 vs. 3M. M, month; mNT, mitoNEET; GAPDH,

945 glyceraldehyde phosphate dehydrogenase.

946

947 **Appendix Table S1.**

| Identified Protein                 | Score | Molecular weight (kDa) | Expected value | NCBI accession number |
|------------------------------------|-------|------------------------|----------------|-----------------------|
| <b>&lt;band around 100 kDa&gt;</b> |       |                        |                |                       |
| Transferrin receptor protein 1     | 131   | 85274                  | 9.2e-009       | cd09848               |

948

949 MASCOT Scores and National Center for Biotechnology Information (NCBI)

950 Accession Numbers of Proteins. Generated by the MASCOT database (Matrix Science,

951 Boston, MA).

952

953 **Appendix Table S2.**

954 Protein sequence coverage: 5%

955 Matched peptides shown in **red**.

1 MMDQARSAFSNLFGEPLSYTRFSLARQVDGDNSHVEMKLAVDEEENADN  
51 NTKANVTKPKRCSGSICYGTIAVIVFFLIGFMIGYLG YCKGVEPKTECER  
101 LAGTESPVREEPGEDFPAARRLYWDDLKRKLEKLDSTDFGTIK**LLNEN**  
151 **SYVPRE**EAGSQKDENLALYVENQFREFKLSKVWRDQHFVKIQVKDSAQNSV  
201 IIVDKNGRLVYLVENPGGYVAYSKAATVTGKLVHANFGTKKDFEDLYTPV  
251 NGSIVIVRAGKITFAEKVANAESLNAIGVLIYMDQTKFPIVNAELFFGH  
301 AHLGTGDPYTPGFPSFNHTQFPPSRSSGLPNIPVQTISRAAAEKLFGNME  
351 GDCPSDWKTDSTCRMVTSESKNVKLTVSNVLKEIKLNIFGVIKGFVEPD  
401 HYVVVGAQRDAWGPGA**AKSGVGTALLL**KLAQMFSDMVLKDGFPQRSRIIF  
451 ASWSAGDFGSGATEWLEGYLSSLHLKAFTYINLDKAVLGTSNFK**VSASP**  
501 **LLYTLIEKTMQNVK**HPVTGQFLYQDSNWASKVEKLTLDNAAFPFLAYSIGI  
551 PAVSFCFCEDTDYPYLGTTMDTYKELIERIPELNKVARAAAEVAGQFVIK  
601 LTHDVELNLDYERYNSQLLSFVRDLNQYRADIKEMGLSLQWLYSARGDFF

651 RATSRLTTDFGNAEKTDRFVMKKLNDRVMRVEYHFLSPYVSPKESPFRRHV  
701 FWGSGSHTLPALLENLKLKQNNGAFNETLFRNQLALATWTIQGAANALS  
751 GDVWDIDNEF

956

957 TfR protein sequence identified by MASCOT search analysis.

958

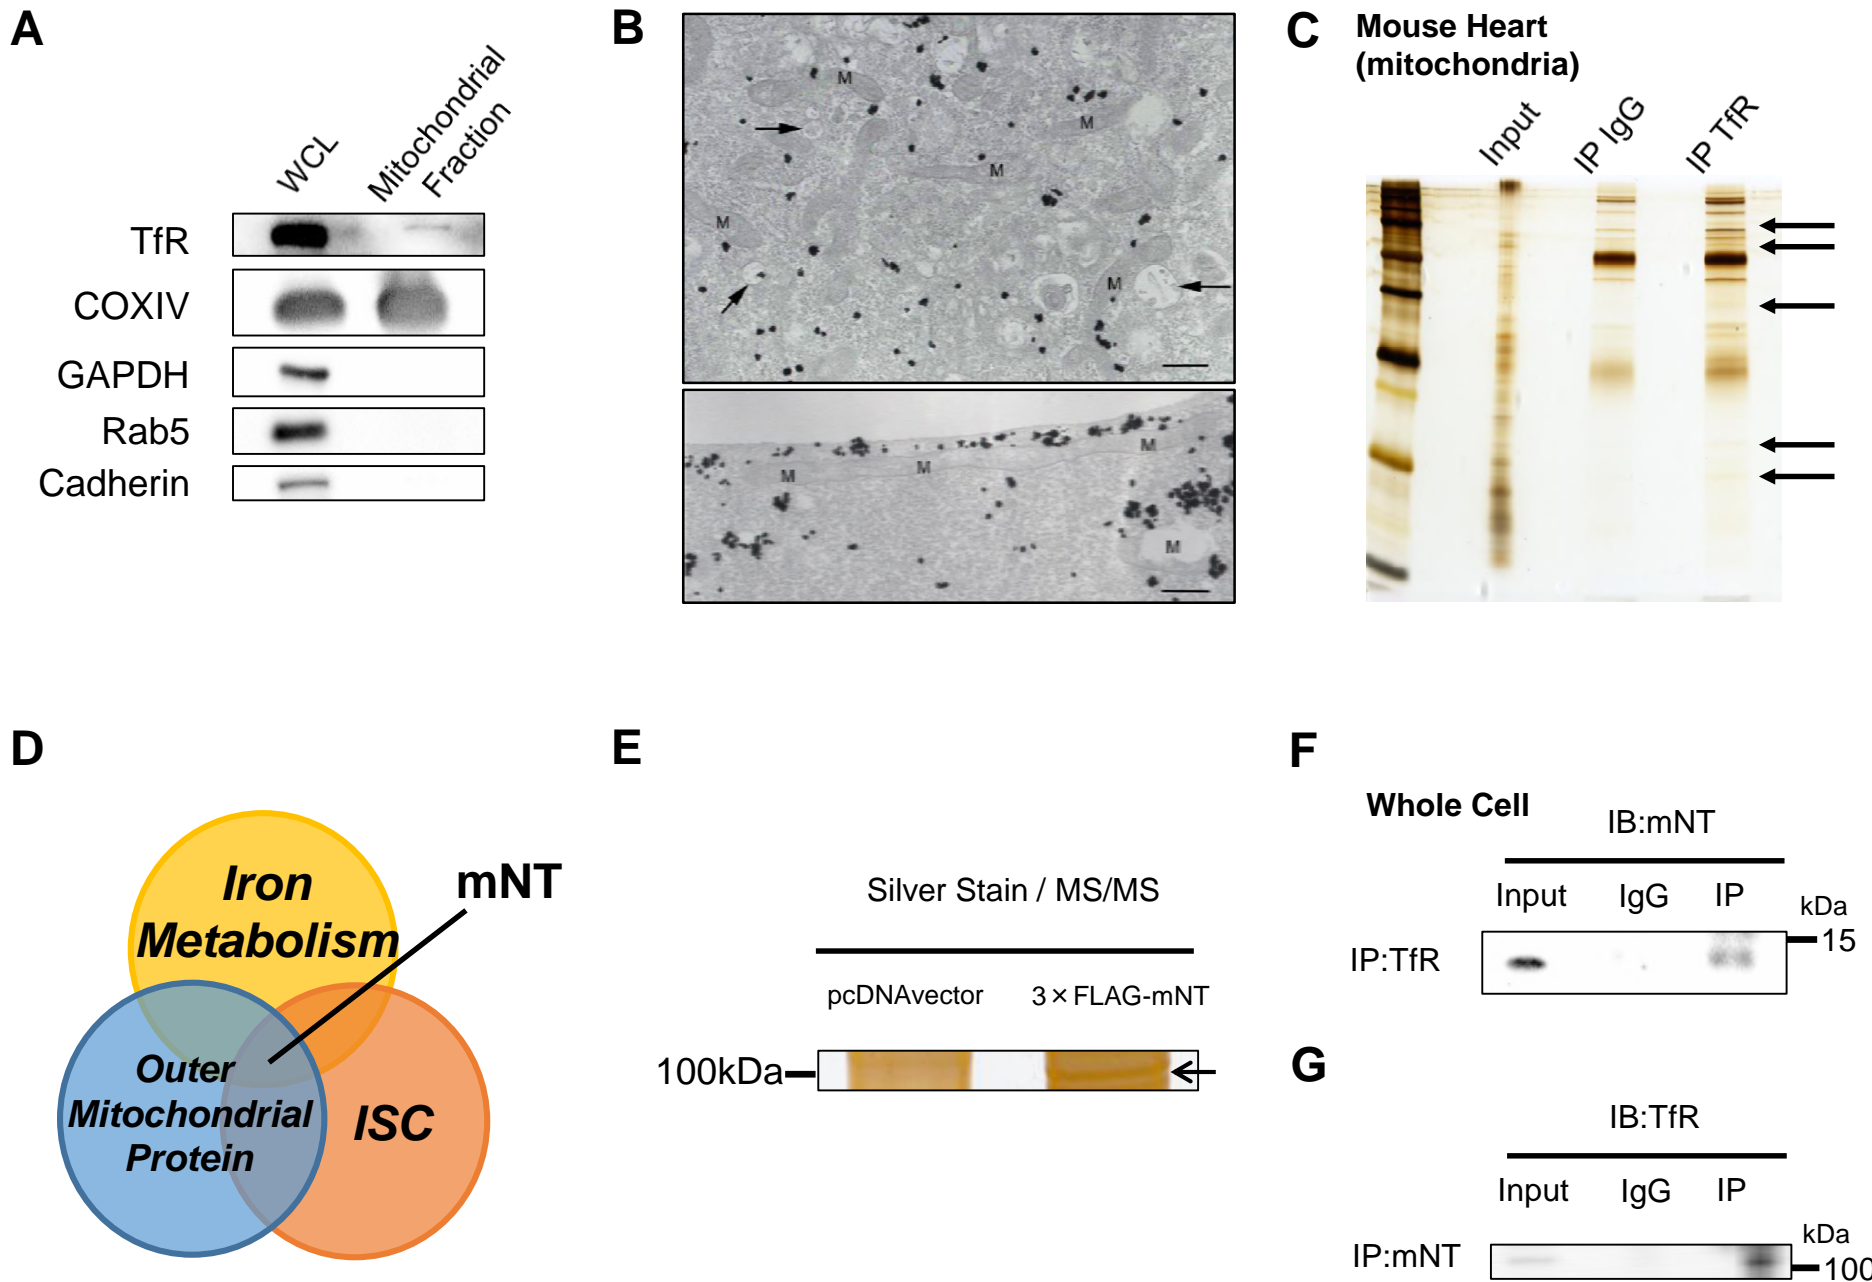

**Figure 1**

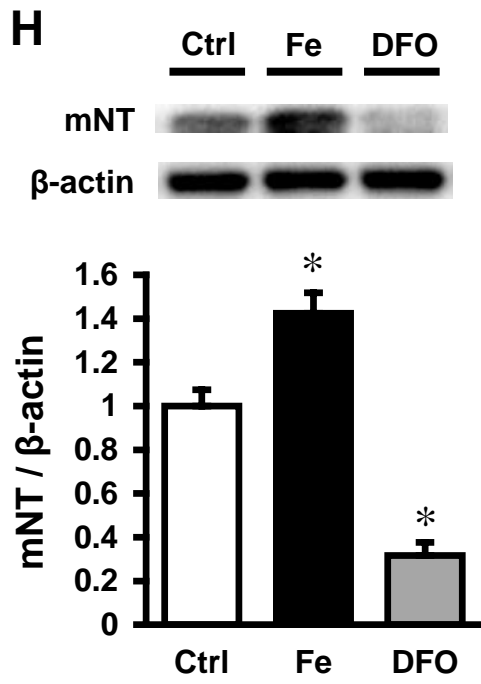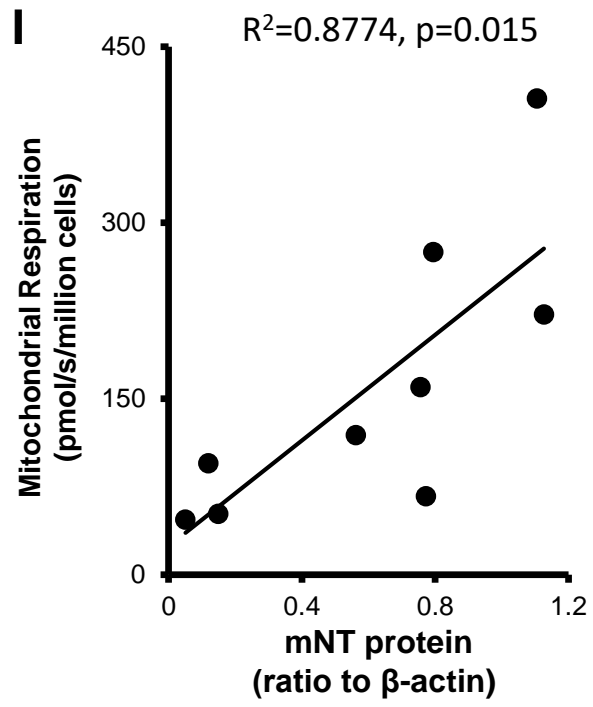

**Figure 1**



**A****Mitochondrial Fraction**

IB:TfR

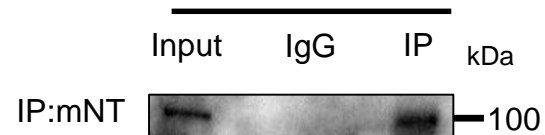

IB:mNT

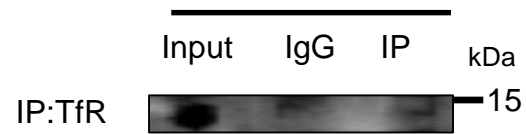**B****Digitonin Concentration**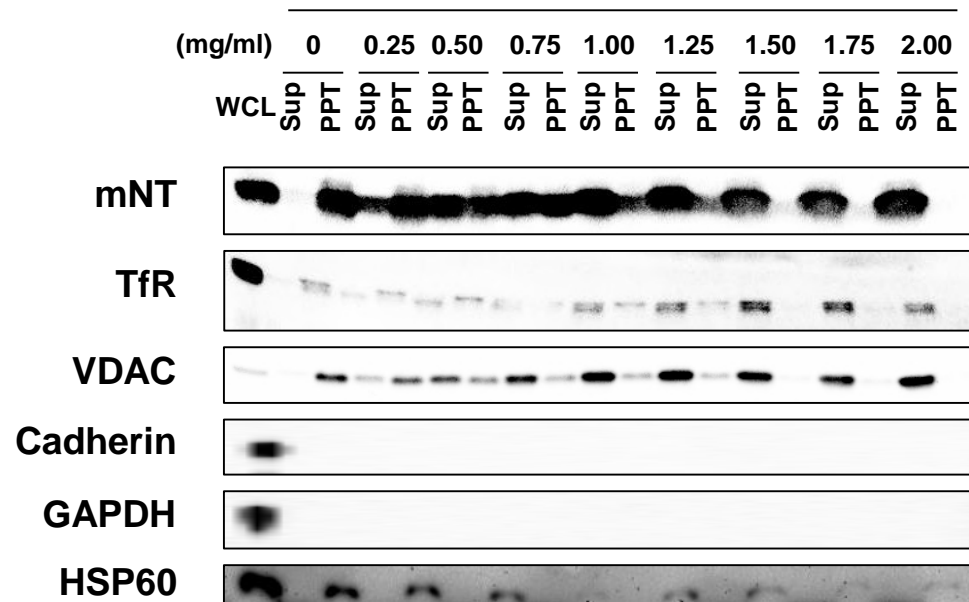**C**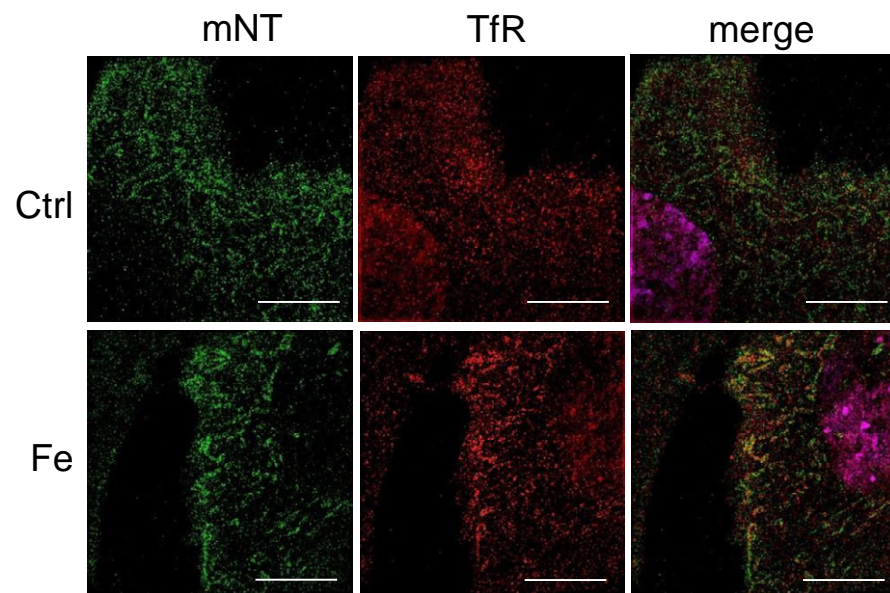**Figure 2**

**A**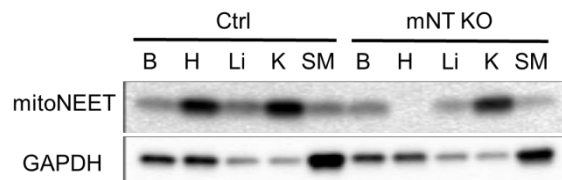**B**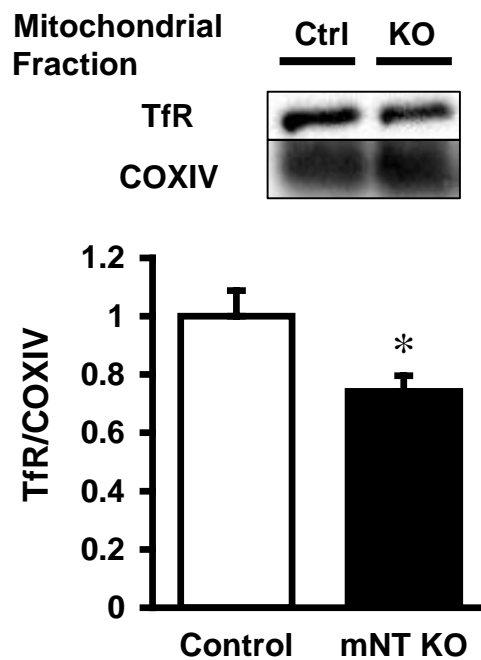**C**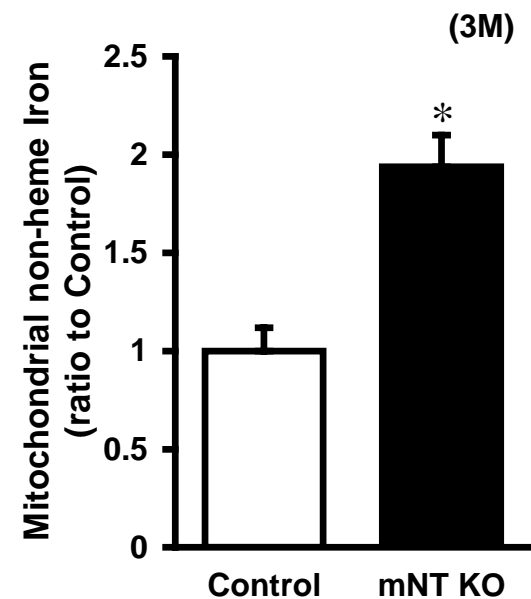**D**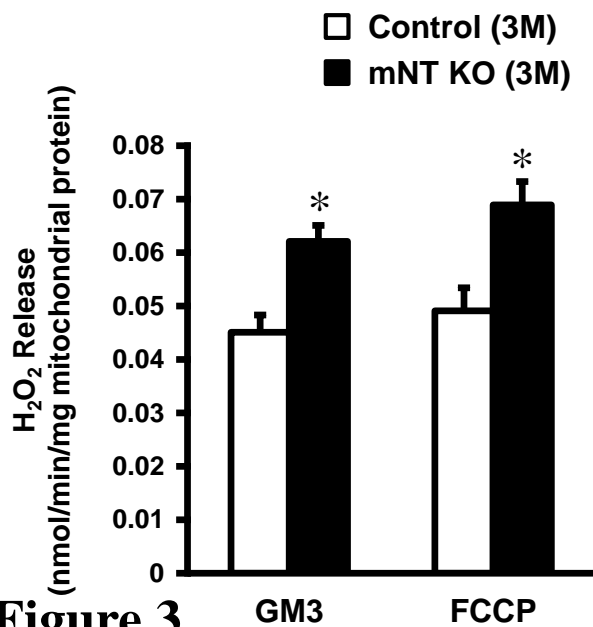**E**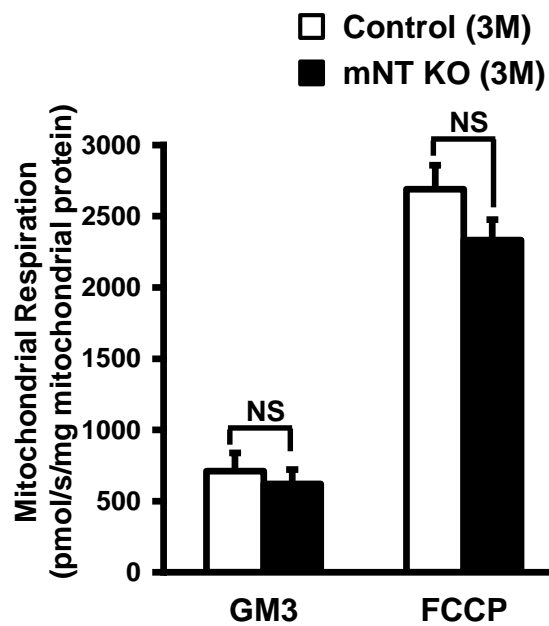**F**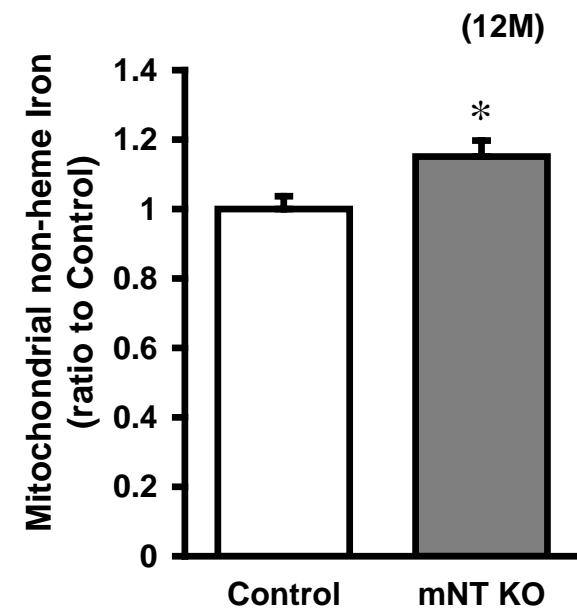**Figure 3**

**G**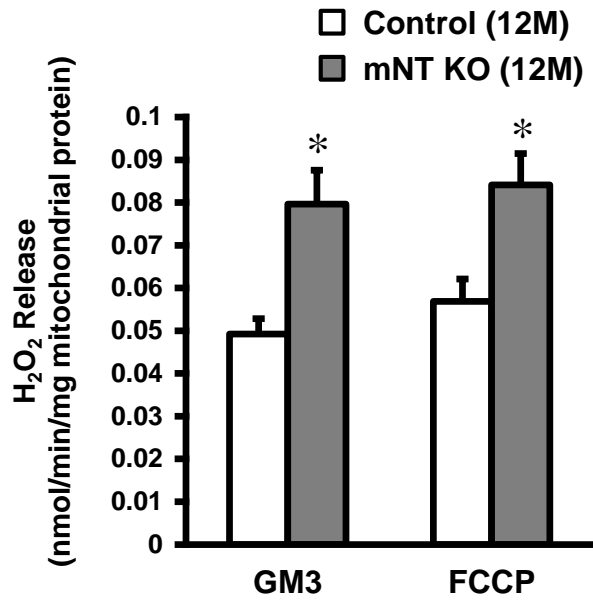**H**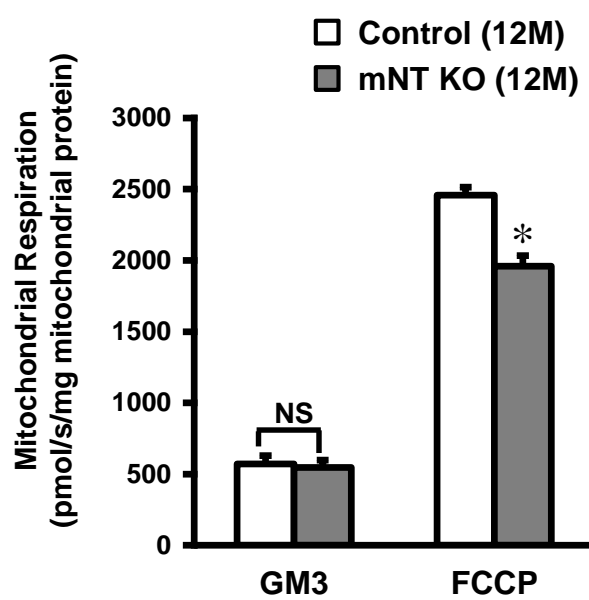**I**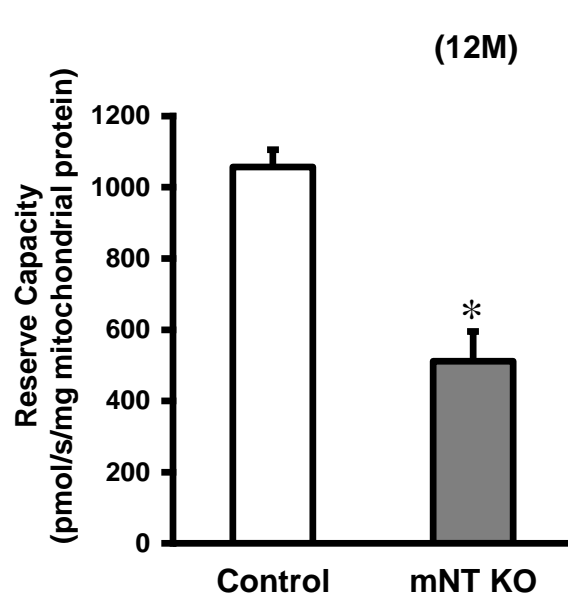**Figure 3**

**A**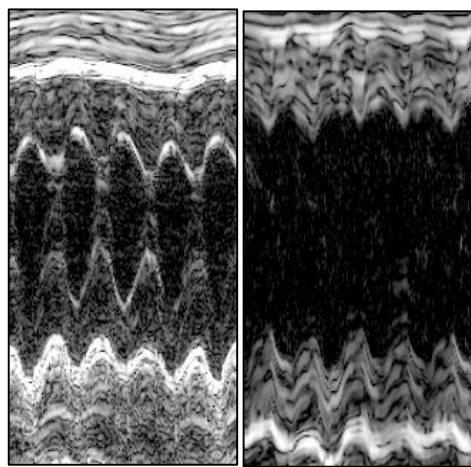

Control

mNT KO

**B**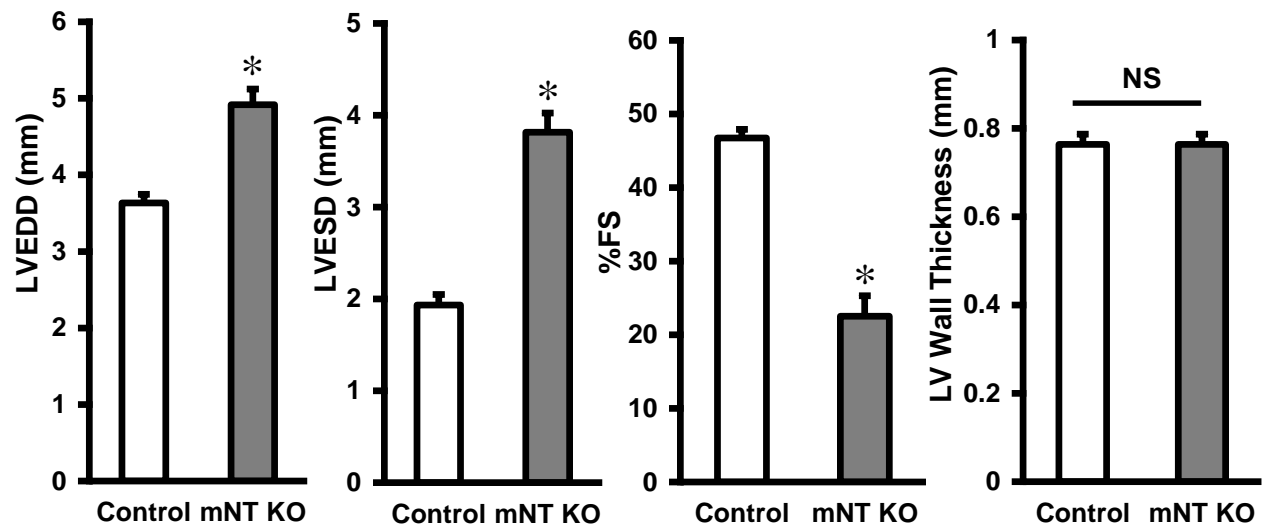**Figure 4**

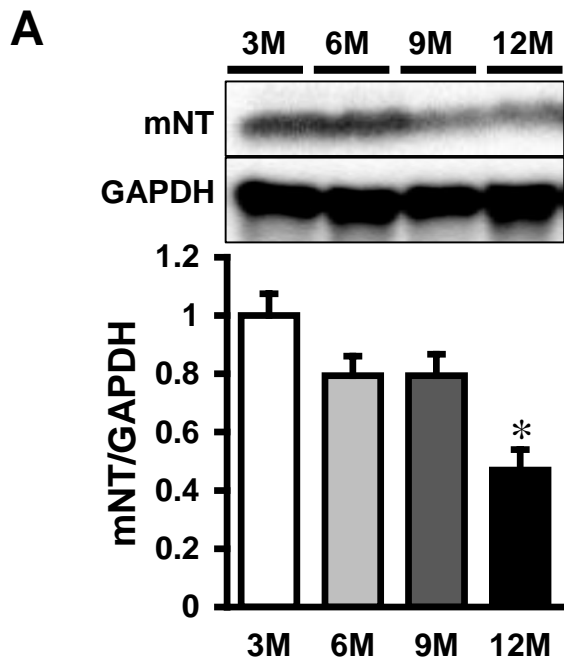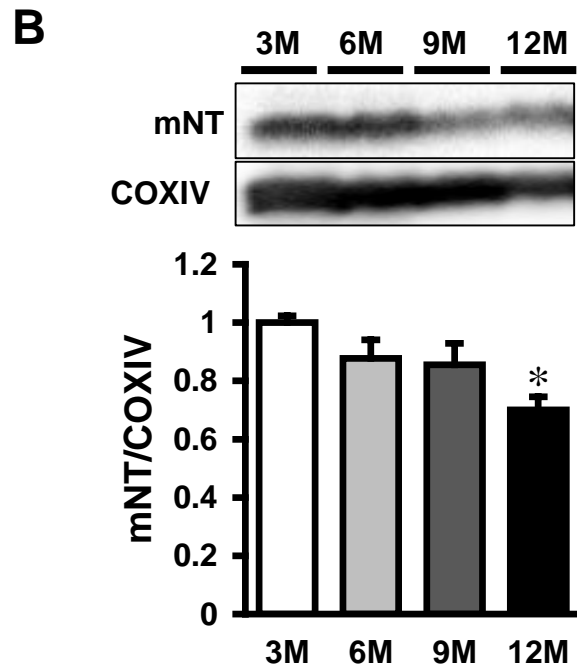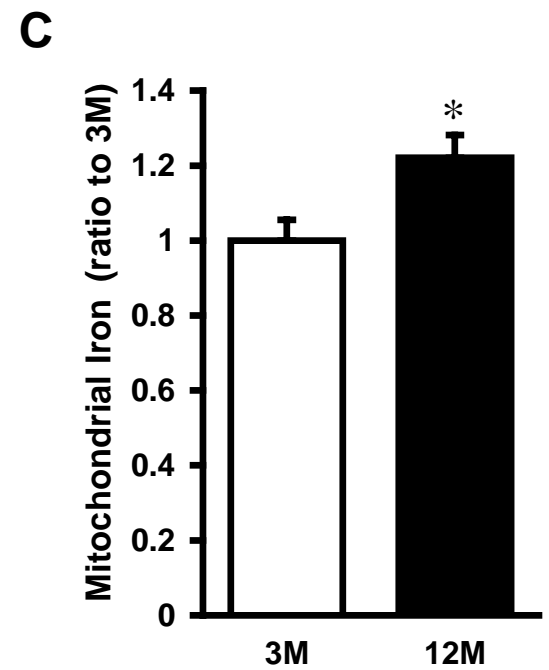

**Figure 5**

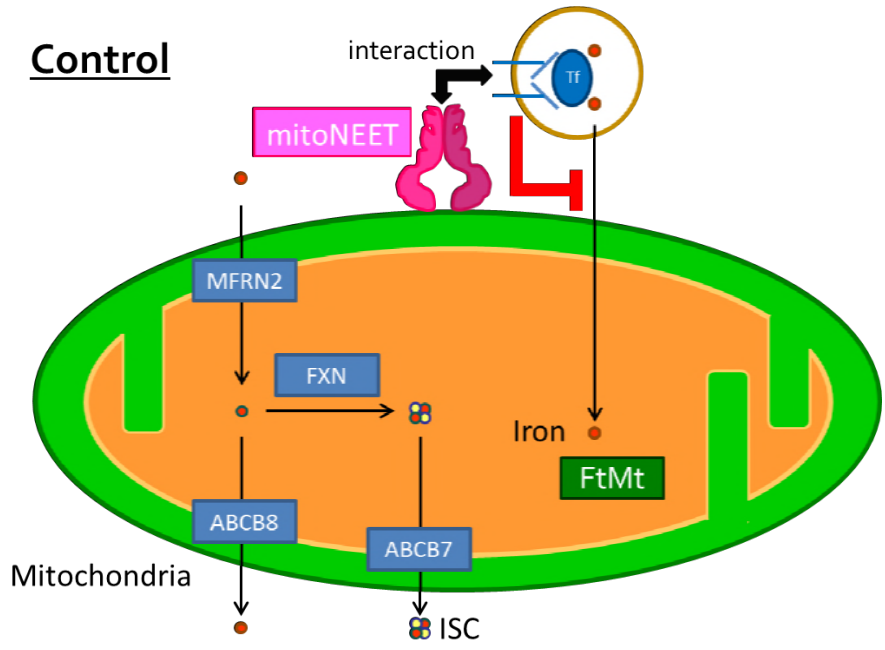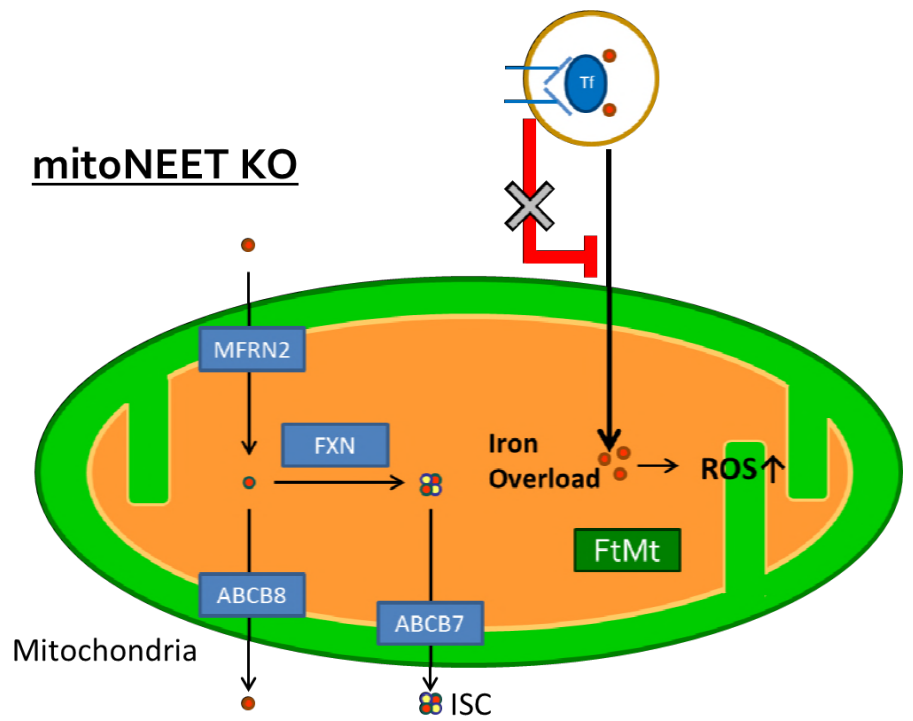

**Figure 6**

**A**

DFO

Fe

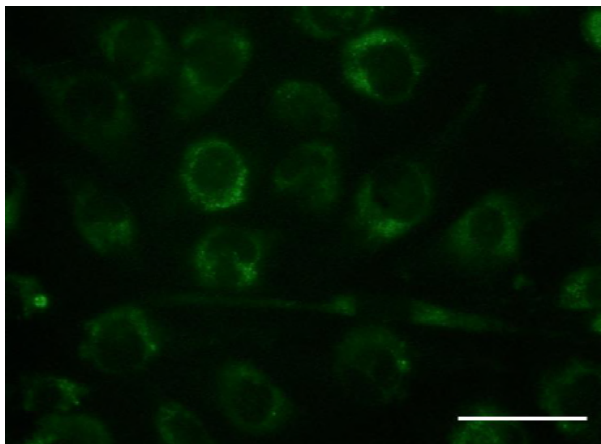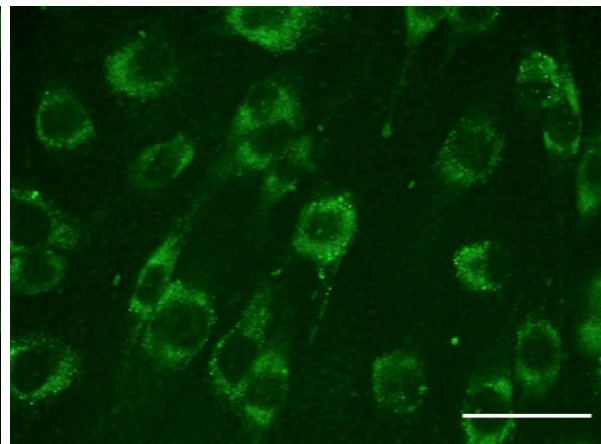

**A**  
Chromosome 10 (C57/BL Background)

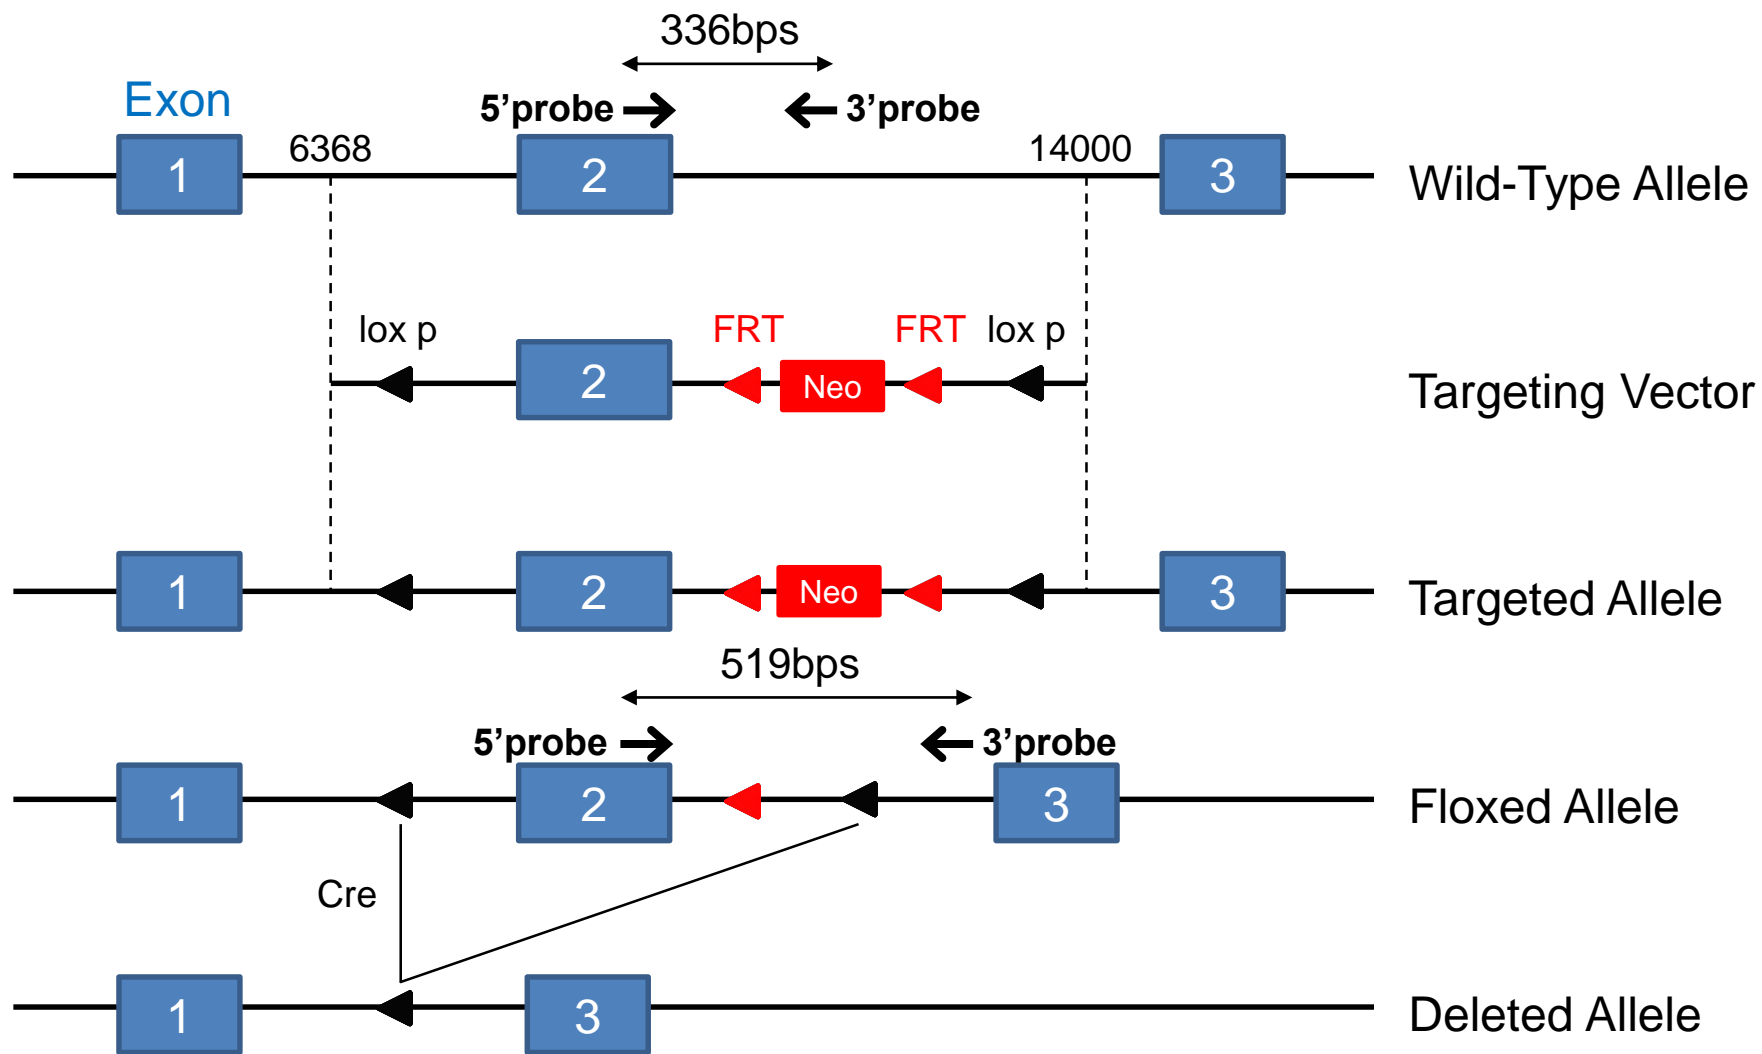



**B**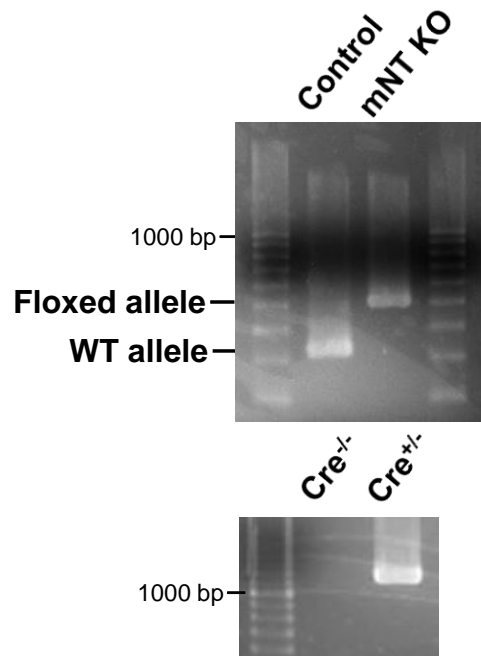**C**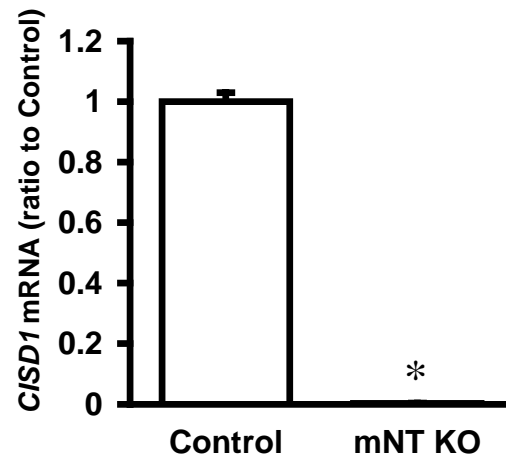**D**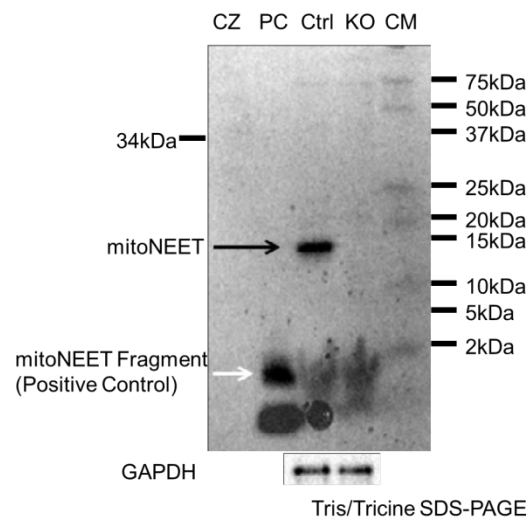**E**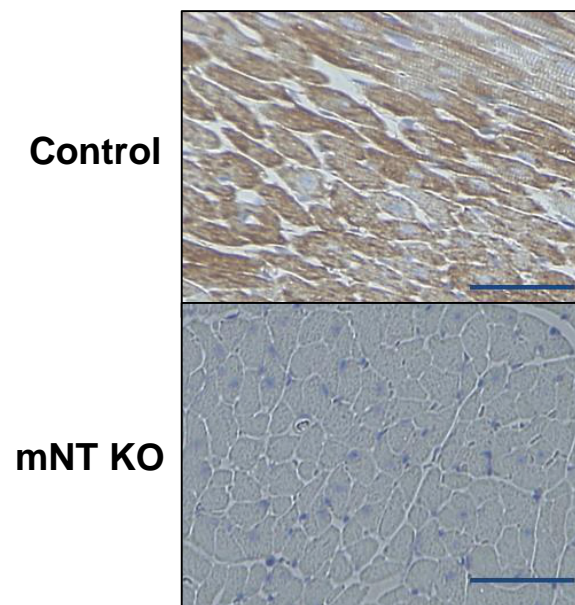**Figure S2**

**A**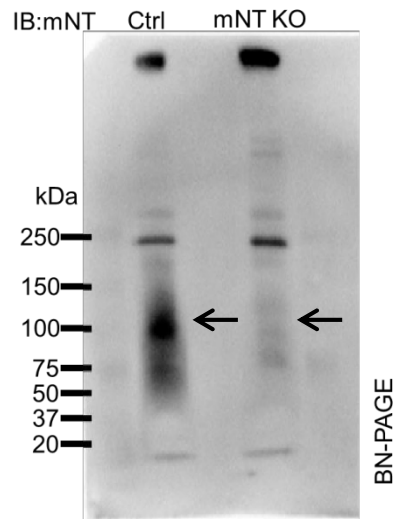

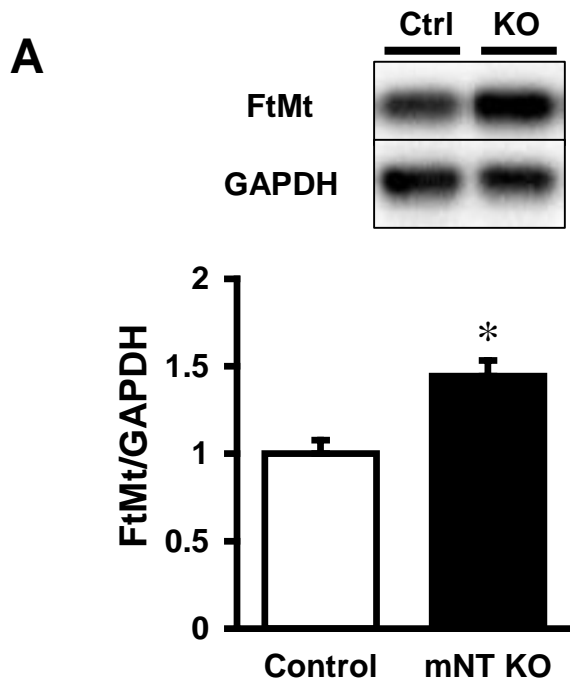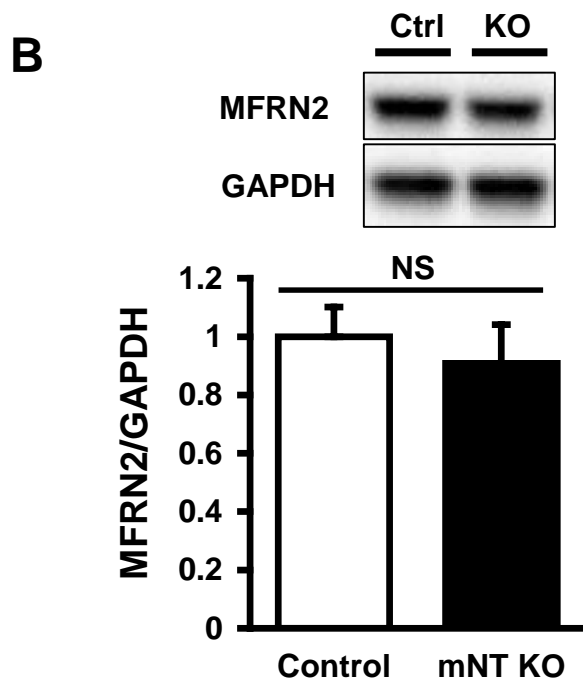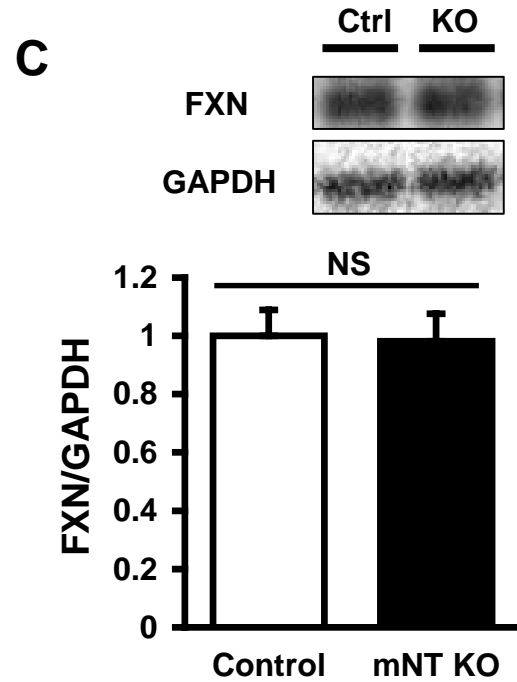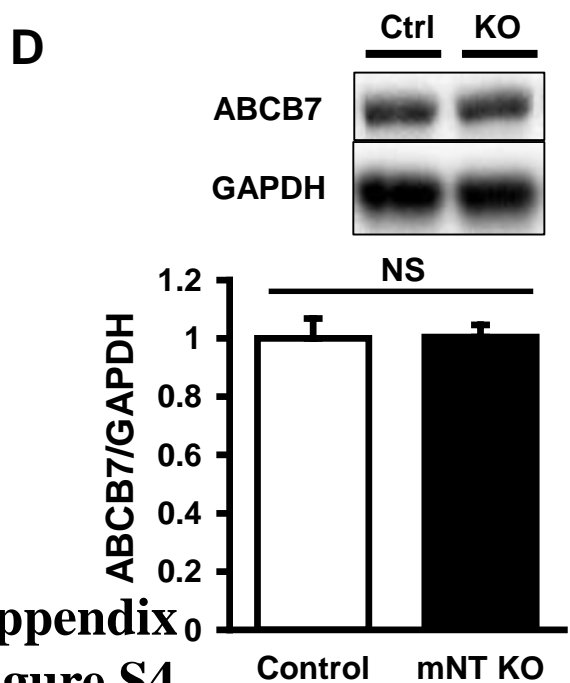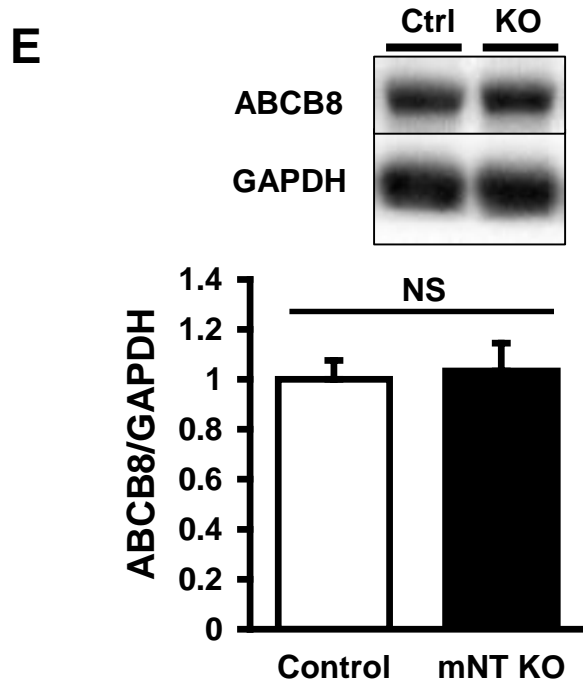

**F**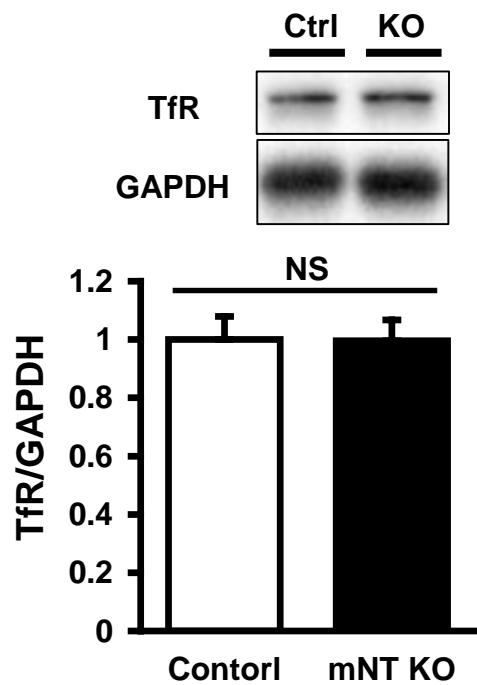**G**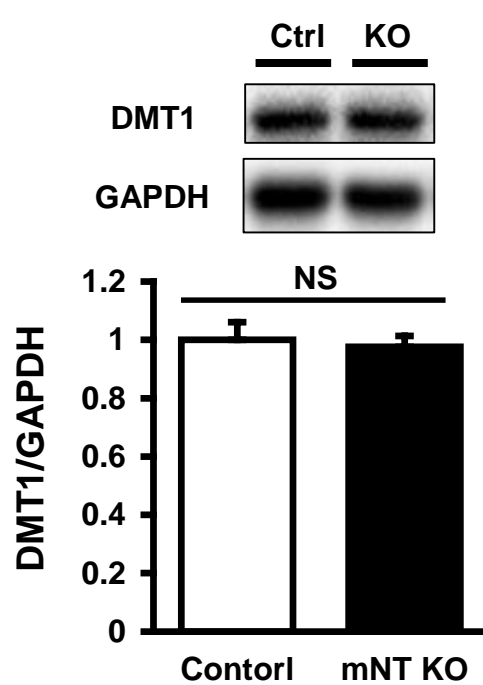**H**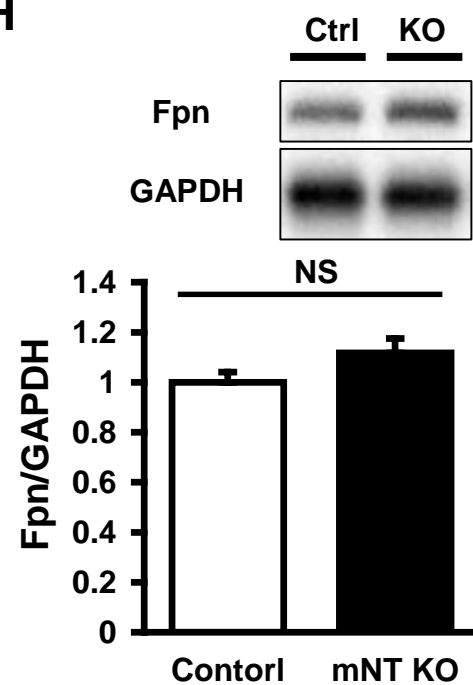**I**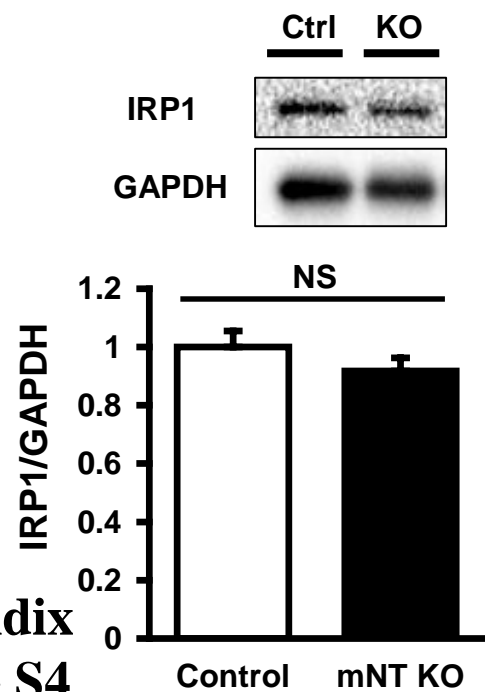**J**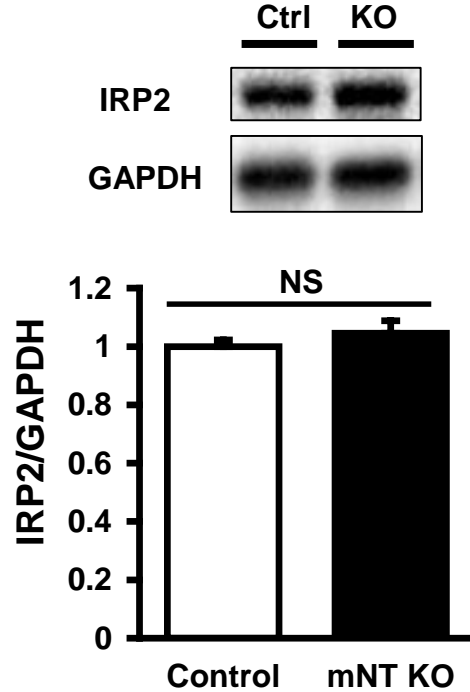

**K**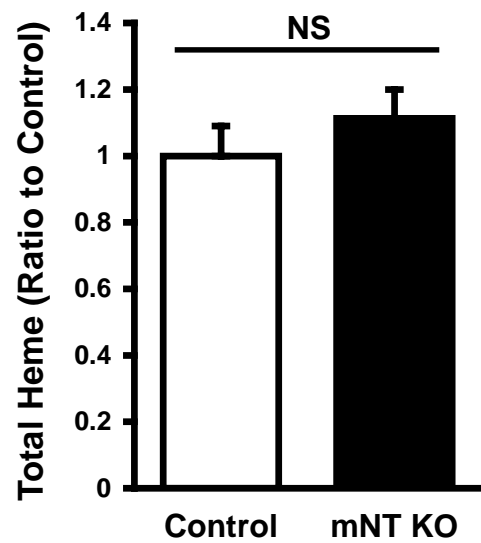**L**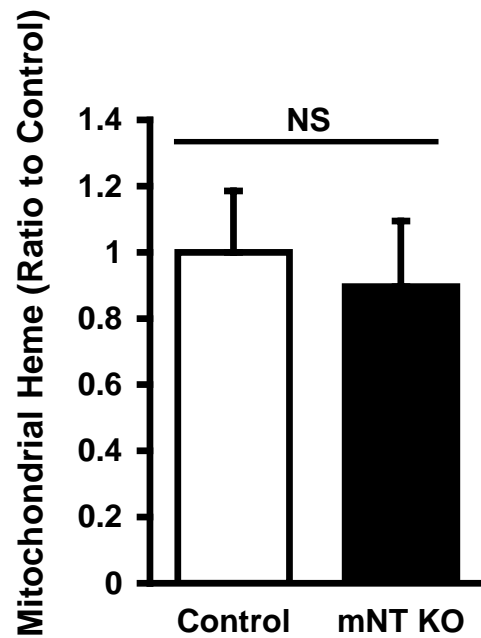**M**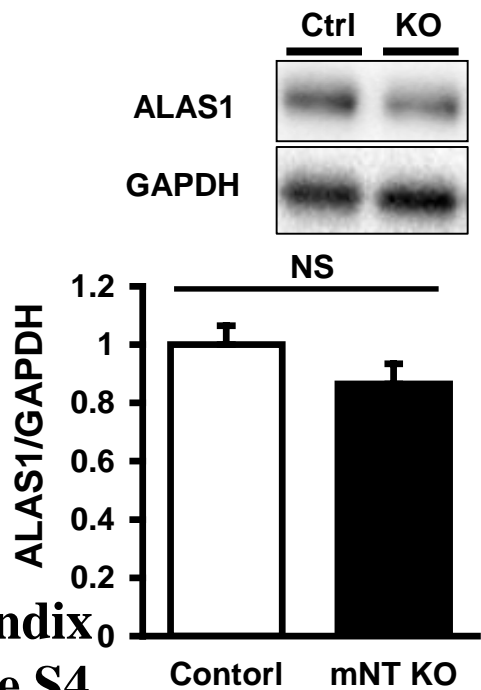**N**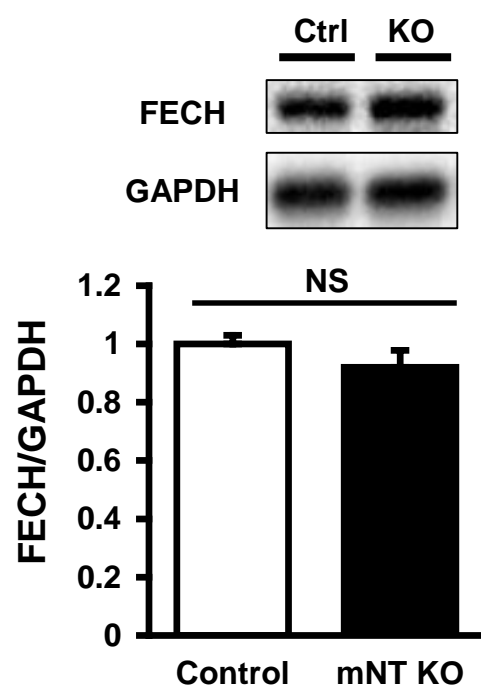

**A**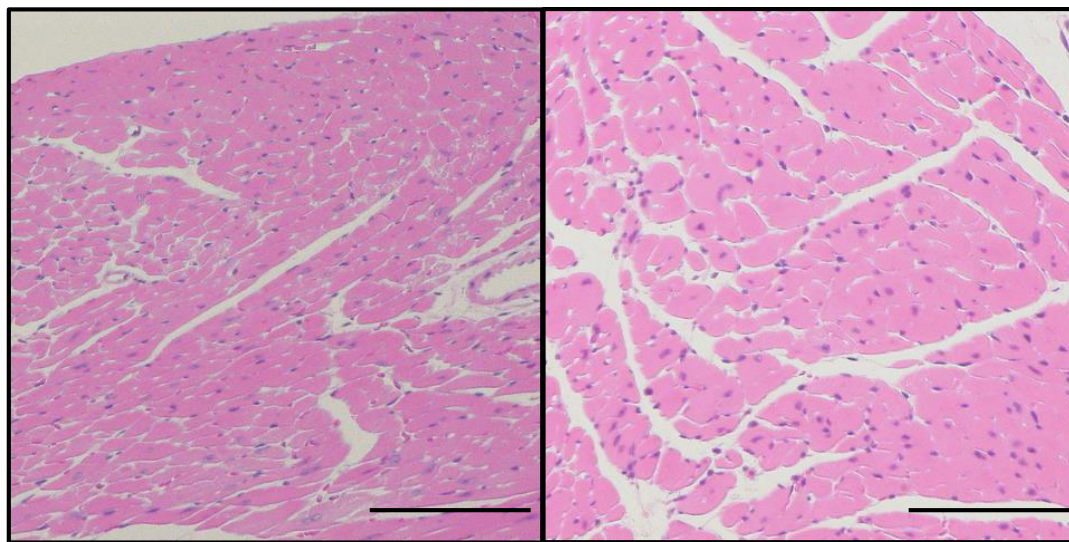**Control(12M)****mNT KO(12M)****B**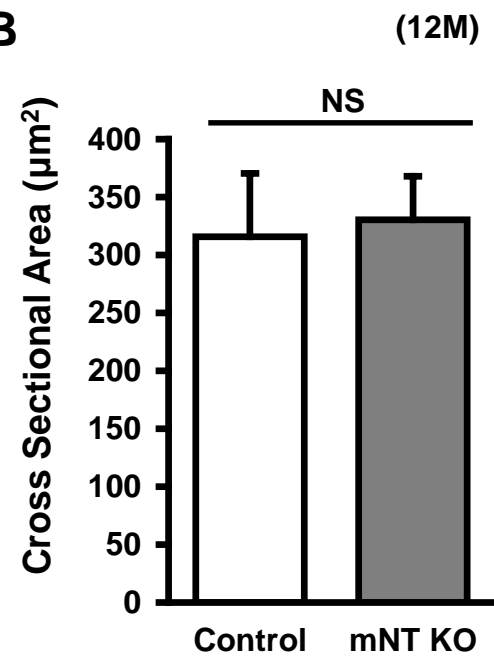**(12M)****NS****Cross Sectional Area (µm<sup>2</sup>)****Control****mNT KO**

**A**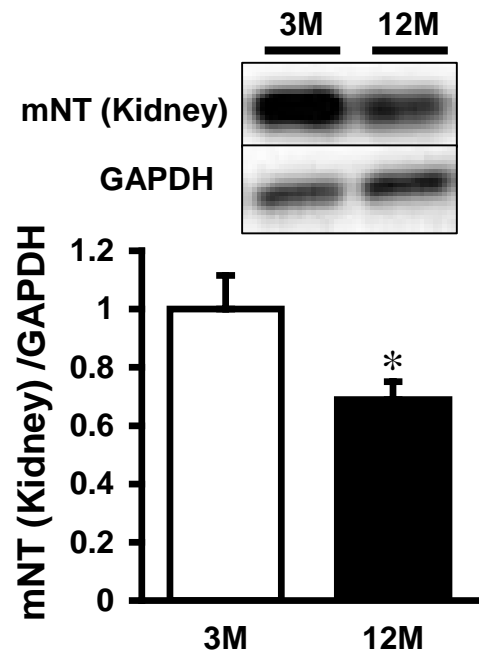

Source: https://www.biorxiv.org/content/10.1101/330084v1.full.pdf
